# Supplementary material for: Genome-wide analysis of the RpoN regulon in Geobacter sulfurreducens
Source: PubMed Central journal article supplement (PMC2725144; doi:10.1186/1471-2164-10-331), 2009-07-22
Supplement: 1471-2164-10-331-S1.pdf [file 1471-2164-10-331-S1.pdf]

**Additional file 1. List of up-regulated genes in the RpoN over-expressing strain as compared to the wild type strain, based on fold change cutoff 1.5**

**Up-Regulated gene list**

| Name      | Product                                                     | Main Role                                                  | Fold changes |
|-----------|-------------------------------------------------------------|------------------------------------------------------------|--------------|
| GSU1279   | cobalamin biosynthesis protein CbiM, putative               | Biosynthesis of cofactors, prosthetic groups, and carriers | 1.81         |
| GSU1917   | undecaprenyl diphosphate synthase                           | Biosynthesis of cofactors, prosthetic groups, and carriers | 1.52         |
| GSU0135   | delta-aminolevulinic acid dehydratase                       | Biosynthesis of cofactors, prosthetic groups, and carriers | 1.5          |
| GSU0727   | lipoprotein, putative                                       | Cell envelope                                              | 2.27         |
| GSU2089   | rod shape-determining protein MreB                          | Cell envelope                                              | 1.87         |
| GSU0667   | membrane protein, putative                                  | Cell envelope                                              | 1.79         |
| GSU2302   | trehalose-phosphatase, putative                             | Cellular processes                                         | 7.53         |
| GSU1880   | S-adenosylmethionine synthetase                             | Central intermediary metabolism                            | 1.56         |
| GSU0364   | cytochrome c3 PpcB                                          | Energy metabolism                                          | 2.78         |
| GSU2504   | cytochrome c family protein OmcS                            | Energy metabolism                                          | 2.6          |
| GSU0466   | cytochrome c551 peroxidase MacA                             | Energy metabolism                                          | 2            |
| GSU1996   | cytochrome c family protein                                 | Energy metabolism                                          | 1.96         |
| GSU1024   | cytochrome c3 PpcD                                          | Energy metabolism                                          | 1.82         |
| GSU3274   | cytochrome c family protein, putative                       | Energy metabolism                                          | 1.77         |
| GSU0994   | fumarate hydratase, class I                                 | Energy metabolism                                          | 1.71         |
| GSU1284   | cytochrome c, putative                                      | Energy metabolism                                          | 1.7          |
| GSU0109   | ATP synthase F0, B subunit                                  | Energy metabolism                                          | 1.61         |
| GSU2732   | cytochrome c family protein                                 | Energy metabolism                                          | 1.61         |
| GSU0108   | ATP synthase F0, B' subunit, putative                       | Energy metabolism                                          | 1.59         |
| GSU3188   | rubredoxin                                                  | Energy metabolism                                          | 1.59         |
| GSU0112   | ATP synthase F1, gamma subunit                              | Energy metabolism                                          | 1.59         |
| GSU2503   | cytochrome c family protein OmcT                            | Energy metabolism                                          | 1.57         |
| GSU1305   | Glu/Leu/Phe/Val dehydrogenase family protein                | Energy metabolism                                          | 1.56         |
| GSU0592   | cytochrome c family protein                                 | Energy metabolism                                          | 1.54         |
| GSU2737   | polyheme membrane-associated cytochrome c OmcB              | Energy metabolism                                          | 1.53         |
| GSU2513   | cytochrome c family protein                                 | Energy metabolism                                          | 1.51         |
| GSU0111   | ATP synthase F1, alpha subunit                              | Energy metabolism                                          | 1.5          |
| GSU1402   | acetyl-CoA carboxylase, carboxyl transferase, alpha subunit | Fatty acid and phospholipid metabolism                     | 1.77         |
| GSU2370   | acetyl-CoA carboxylase, carboxyl transferase, beta subunit  | Fatty acid and phospholipid metabolism                     | 1.57         |
| GSU1601   | 3-oxoacyl-(acyl-carrier-protein) synthase III               | Fatty acid and phospholipid metabolism                     | 1.55         |
| GSU0723   | hypothetical protein                                        | Hypothetical proteins                                      | 2.86         |
| GSU3467   | conserved hypothetical protein TIGR00278                    | Hypothetical proteins                                      | 2.12         |
| GSU3105   | hypothetical protein                                        | Hypothetical proteins                                      | 1.94         |
| GSU0384   | hypothetical protein                                        | Hypothetical proteins                                      | 1.81         |
| GSU3467.1 | conserved hypothetical protein TIGR00278                    | Hypothetical proteins                                      | 1.76         |
| GSU2518   | hypothetical protein                                        | Hypothetical proteins                                      | 1.71         |
| GSU3106   | hypothetical protein                                        | Hypothetical proteins                                      | 1.7          |

## Additional file 1

|           |                                                      |                       |      |
|-----------|------------------------------------------------------|-----------------------|------|
| GSU3289   | hypothetical protein                                 | Hypothetical proteins | 1.67 |
| GSU1771   | hypothetical protein                                 | Hypothetical proteins | 1.54 |
| GSU1278   | hypothetical protein                                 | Hypothetical proteins | 1.53 |
| GSU0450   | hypothetical protein                                 | Hypothetical proteins | 1.52 |
| GSU3410   | hypothetical protein                                 | No Data               | 3.31 |
| GSU0468   | hypothetical protein                                 | No Data               | 3.2  |
| GSU0722   | hypothetical protein                                 | No Data               | 2.86 |
| GSU0595b  | No Data                                              | No Data               | 2.56 |
| GSU2407   | hypothetical protein                                 | No Data               | 2.48 |
| GSU1876   | hypothetical protein                                 | No Data               | 2.28 |
| GSU1994   | hypothetical protein                                 | No Data               | 1.9  |
| GSU2496   | hypothetical protein                                 | No Data               | 1.74 |
| GSU2733   | hypothetical protein                                 | No Data               | 1.71 |
| GSU0336   | hypothetical protein                                 | No Data               | 1.67 |
| GSU2739   | hypothetical protein                                 | No Data               | 1.67 |
| GSU2077   | hypothetical protein                                 | No Data               | 1.65 |
| GSU1949   | hypothetical protein                                 | No Data               | 1.56 |
| GSU1366   | hypothetical protein                                 | No Data               | 1.52 |
| GSU0335   | hypothetical protein                                 | No Data               | 1.51 |
| GSU1412   | hypothetical protein                                 | No Data               | 1.5  |
| GSU2390   | heat shock protein HtpG                              | Protein fate          | 1.98 |
| GSU1793   | trigger factor                                       | Protein fate          | 1.98 |
| GSU0033   | chaperone protein dnaK                               | Protein fate          | 1.94 |
| GSU2408   | heat shock protein, Hsp20 family                     | Protein fate          | 1.75 |
| GSU1792   | ATP-dependent Clp protease, proteolytic subunit ClpP | Protein fate          | 1.68 |
| GSU3340   | 60 kDa chaperonin                                    | Protein fate          | 1.67 |
| GSU0034   | chaperone protein dnaJ                               | Protein fate          | 1.66 |
| GSU1627   | preprotein translocase, SecG subunit                 | Protein fate          | 1.65 |
| GSU3339   | chaperonin, 10 kDa                                   | Protein fate          | 1.63 |
| GSU1610   | efflux transporter, RND family, MFP subunit          | Protein fate          | 1.57 |
| GSU2869   | preprotein translocase, SecE subunit, putative       | Protein fate          | 1.54 |
| GSU0658   | ClpB protein                                         | Protein fate          | 1.51 |
| GSU1791   | ATP-dependent Clp protease, ATP-binding subunit ClpX | Protein fate          | 1.51 |
| GSU2876   | ribosomal protein L13                                | Protein synthesis     | 2.21 |
| GSU2875   | ribosomal protein S9                                 | Protein synthesis     | 2.09 |
| GSU2861.1 | ribosomal protein S12                                | Protein synthesis     | 1.89 |
| GSU2206   | ribosomal protein S20                                | Protein synthesis     | 1.85 |
| GSU2853   | ribosomal protein S19                                | Protein synthesis     | 1.82 |
| GSU2234   | ribosomal protein L28                                | Protein synthesis     | 1.79 |
| GSU0665   | ribosomal protein S6                                 | Protein synthesis     | 1.78 |
| GSU0662   | ribosomal protein L25                                | Protein synthesis     | 1.76 |
| GSU0668   | ribosomal protein L9                                 | Protein synthesis     | 1.76 |

## Additional file 1

|         |                                                           |                                                    |      |
|---------|-----------------------------------------------------------|----------------------------------------------------|------|
| GSU2861 | ribosomal protein S7                                      | Protein synthesis                                  | 1.68 |
| GSU2854 | ribosomal protein L2                                      | Protein synthesis                                  | 1.68 |
| GSU2855 | ribosomal protein L23                                     | Protein synthesis                                  | 1.67 |
| GSU2857 | ribosomal protein L3                                      | Protein synthesis                                  | 1.66 |
| GSU2858 | ribosomal protein S10                                     | Protein synthesis                                  | 1.65 |
| GSU3236 | ribosomal protein L21                                     | Protein synthesis                                  | 1.63 |
| GSU2866 | ribosomal protein L1                                      | Protein synthesis                                  | 1.63 |
| GSU1752 | translation elongation factor P                           | Protein synthesis                                  | 1.61 |
| GSU0666 | ribosomal protein S18                                     | Protein synthesis                                  | 1.61 |
| GSU2867 | ribosomal protein L11                                     | Protein synthesis                                  | 1.61 |
| GSU2852 | ribosomal protein L22                                     | Protein synthesis                                  | 1.58 |
| GSU2870 | ribosomal protein L33                                     | Protein synthesis                                  | 1.58 |
| GSU2850 | ribosomal protein L16                                     | Protein synthesis                                  | 1.56 |
| GSU2845 | ribosomal protein L5                                      | Protein synthesis                                  | 1.56 |
| GSU1599 | ribosomal protein L32                                     | Protein synthesis                                  | 1.56 |
| GSU1921 | ribosomal protein S2                                      | Protein synthesis                                  | 1.55 |
| GSU2856 | ribosomal protein L4                                      | Protein synthesis                                  | 1.54 |
| GSU2849 | ribosomal protein L29                                     | Protein synthesis                                  | 1.53 |
| GSU2844 | ribosomal protein S14                                     | Protein synthesis                                  | 1.53 |
| GSU2848 | ribosomal protein S17                                     | Protein synthesis                                  | 1.51 |
| GSU3104 | peptide chain release factor 1                            | Protein synthesis                                  | 1.51 |
| GSU1920 | translation elongation factor Ts                          | Protein synthesis                                  | 1.51 |
| GSU2841 | ribosomal protein L18                                     | Protein synthesis                                  | 1.51 |
| GSU1110 | nucleoside diphosphate kinase                             | Purines, pyrimidines, nucleosides, and nucleotides | 2.06 |
| GSU2698 | transcriptional regulator, TetR family                    | Regulatory functions                               | 2.26 |
| GSU2666 | transcriptional regulator, TetR family                    | Regulatory functions                               | 1.98 |
| GSU1836 | nitrogen regulatory protein P-II                          | Regulatory functions                               | 1.77 |
| GSU1521 | integration host factor, alpha subunit                    | Regulatory functions                               | 1.75 |
| GSU3292 | transcriptional regulator, Fur family                     | Regulatory functions                               | 1.64 |
| GSU1522 | transcriptional regulator, putative                       | Regulatory functions                               | 1.64 |
| GSU0514 | transcriptional regulator, lclR family                    | Regulatory functions                               | 1.58 |
| GSU3206 | dnaK suppressor protein, putative                         | Regulatory functions                               | 1.56 |
| GSU2969 | sensory box/GGDEF family protein                          | Regulatory functions                               | 1.53 |
| GSU2219 | response regulator                                        | Signal transduction                                | 1.69 |
| GSU1887 | RNA polymerase sigma-54 factor                            | Transcription                                      | 6.61 |
| GSU3089 | RNA polymerase sigma factor RpoD                          | Transcription                                      | 2.08 |
| GSU0655 | RNA polymerase sigma-32 factor                            | Transcription                                      | 1.97 |
| GSU0491 | ATP-dependent RNA helicase RhlE                           | Transcription                                      | 1.83 |
| GSU2862 | DNA-directed RNA polymerase, beta prime subunit           | Transcription                                      | 1.61 |
| GSU2303 | Na <sup>+</sup> /H <sup>+</sup> antiporter family protein | Transport and binding proteins                     | 3.42 |
| GSU2697 | multidrug resistance protein                              | Transport and binding proteins                     | 2.45 |
| GSU2696 | AcrB/AcrD/AcrF family protein                             | Transport and binding proteins                     | 2.23 |

## Additional file 1

|         |                                                   |                                |      |
|---------|---------------------------------------------------|--------------------------------|------|
| GSU2665 | efflux transporter, RND family, MFP subunit       | Transport and binding proteins | 2.16 |
| GSU0496 | efflux transporter, RND family, MFP subunit       | Transport and binding proteins | 1.95 |
| GSU2751 | C4-dicarboxylate transporter, anaerobic           | Transport and binding proteins | 1.63 |
| GSU0534 | Rrf2 family protein                               | Unknown function               | 1.91 |
| GSU0174 | acetyl-CoA hydrolase/transferase family protein   | Unknown function               | 1.86 |
| GSU0455 | rare lipoprotein A domain protein                 | Unknown function               | 1.79 |
| GSU1877 | oxidoreductase, 2-nitropropane dioxygenase family | Unknown function               | 1.7  |
| GSU2715 | fibronectin type III domain protein               | Unknown function               | 1.68 |
| GSU1904 | decarboxylase family protein                      | Unknown function               | 1.66 |
| GSU0024 | OmpA domain protein                               | Unknown function               | 1.66 |
| GSU0023 | TPR domain protein                                | Unknown function               | 1.61 |
| GSU1233 | phosphoesterase, putative                         | Unknown function               | 1.6  |
| GSU1721 | radical SAM domain protein                        | Unknown function               | 1.59 |
| GSU0029 | hydrolase, carbon-nitrogen family                 | Unknown function               | 1.58 |
| GSU1925 | transport-associated domain protein               | Unknown function               | 1.56 |
| GSU3091 | CvpA family protein                               | Unknown function               | 1.52 |
| GSU0490 | acetyl-CoA hydrolase/transferase family protein   | Unknown function               | 1.52 |

---
