# Supplementary material for: Genome-wide analysis of the RpoN regulon in Geobacter sulfurreducens
Source: PubMed Central journal article supplement (PMC2725144; doi:10.1186/1471-2164-10-331), 2009-07-22
Supplement: 1471-2164-10-331-S2.pdf [file 1471-2164-10-331-S2.pdf]

**Additional file 2. List of down-regulated genes in the RpoN over-expressing strain as compared to the wild type strain, based on fold change****cutoff 1.5****Down-regulated gene list**

| Name      | Product                                                                         | Main Role                                     | Fold changes |
|-----------|---------------------------------------------------------------------------------|-----------------------------------------------|--------------|
| GSU1561   | penicillin-binding protein, 1A family                                           | Cell envelope                                 | 1.93         |
| GSU0428   | lipoprotein, putative                                                           | Cell envelope                                 | 1.82         |
| GSU0805   | cytoplasmic membrane protein FsxA                                               | Cell envelope                                 | 1.66         |
| GSU2360   | maltooligosyltrehalose synthase, putative                                       | Cell envelope                                 | 1.65         |
| GSU1853   | membrane protein, putative                                                      | Cell envelope                                 | 1.63         |
| GSU1549   | lipoprotein, putative                                                           | Cell envelope                                 | 1.56         |
| GSU0038   | lipoprotein, putative                                                           | Cell envelope                                 | 1.55         |
| GSU2326   | outer membrane lipoprotein                                                      | Cell envelope                                 | 1.52         |
| GSU2122   | TraG family protein                                                             | Cellular processes                            | 1.94         |
| GSU0422   | flagellar motor switch protein FliN                                             | Cellular processes                            | 1.93         |
| GSU0425   | flagellar biosynthesis protein FliR                                             | Cellular processes                            | 1.72         |
| GSU2416   | chemotaxis protein CheW                                                         | Cellular processes                            | 1.71         |
| GSU2555   | melittin resistance protein, putative                                           | Cellular processes                            | 1.52         |
| GSU3015   | flagellin FlaG, putative                                                        | Cellular processes                            | 1.51         |
| GSU1300   | methyl-accepting chemotaxis protein                                             | Cellular processes                            | 1.51         |
| GSU1810   | cell cycle protein MesJ, putative                                               | Cellular processes                            | 1.5          |
| GSU1507   | heptosyltransferase family protein, putative                                    | Central intermediary metabolism               | 1.53         |
| GSU1421   | nuclease SbcCD, D subunit, putative                                             | DNA metabolism                                | 1.53         |
| GSU3228   | cytochrome c family protein                                                     | Energy metabolism                             | 1.59         |
| GSU2656   | pyruvate dehydrogenase complex E2 component, dihydrolipoamide acetyltransferase | Energy metabolism                             | 1.5          |
| GSU0796   | acyl-CoA thioester hydrolase, putative                                          | Fatty acid and phospholipid metabolism        | 1.51         |
| GSU3085   | conserved hypothetical protein TIGR00486                                        | Hypothetical proteins                         | 1.57         |
| GSU3251   | hypothetical protein                                                            | Hypothetical proteins                         | 1.56         |
| GSU1513   | hypothetical protein                                                            | Hypothetical proteins                         | 1.51         |
| GSU2471   | group II intron, maturase                                                       | Mobile and extrachromosomal element functions | 7.22         |
| GSU2772   | ISGsu3, transposase                                                             | Mobile and extrachromosomal element functions | 1.53         |
| GSU1447   | hypothetical protein                                                            | No Data                                       | 2.43         |
| GSU2142.1 | No Data                                                                         | No Data                                       | 2.2          |
| GSU3227   | hypothetical protein                                                            | No Data                                       | 1.82         |
| GSU3034   | hypothetical protein                                                            | No Data                                       | 1.81         |
| GSU1226   | hypothetical protein                                                            | No Data                                       | 1.7          |
| GSU1330b  | No Data                                                                         | No Data                                       | 1.69         |
| GSU2036   | hypothetical protein                                                            | No Data                                       | 1.66         |
| GSU0759   | hypothetical protein                                                            | No Data                                       | 1.6          |
| GSU2116   | hypothetical protein                                                            | No Data                                       | 1.59         |
| GSU0639   | hypothetical protein                                                            | No Data                                       | 1.56         |
| GSU0330   | general secretion pathway protein C, putative                                   | Protein fate                                  | 1.53         |
| GSU2000   | tRNA delta(2)-isopentenylpyrophosphate transferase                              | Protein synthesis                             | 1.73         |
| GSU2524   | sigma-54 dependent DNA-binding response regulator                               | Signal transduction                           | 2.61         |
| GSU0255   | sensory box histidine kinase                                                    | Signal transduction                           | 1.9          |

## Additional file 2

|         |                                                       |                                |      |
|---------|-------------------------------------------------------|--------------------------------|------|
| GSU3263 | response regulator                                    | Signal transduction            | 1.68 |
| GSU3252 | sensor histidine kinase                               | Signal transduction            | 1.58 |
| GSU0035 | 2',5' RNA ligase, putative                            | Transcription                  | 1.93 |
| GSU1723 | mechanosensitive ion channel family protein           | Transport and binding proteins | 2.57 |
| GSU1340 | ABC transporter, permease protein                     | Transport and binding proteins | 1.68 |
| GSU1435 | peptide ABC transporter, permease protein             | Transport and binding proteins | 1.68 |
| GSU2339 | monovalent cation/proton antiporter, MrpF/PhaF family | Transport and binding proteins | 1.6  |
| GSU1732 | branched-chain amino acid ABC transporter, permease   | Transport and binding proteins | 1.53 |
| GSU1349 | sulfate ABC transporter, ATP-binding protein          | Transport and binding proteins | 1.53 |
| GSU2769 | metallo-beta-lactamase family protein                 | Unknown function               | 2.47 |
| GSU1009 | GTP-binding protein                                   | Unknown function               | 2.15 |
| GSU0314 | general secretion protein E N-terminal domain protein | Unknown function               | 1.77 |
| GSU1090 | signal transduction protein-related protein           | Unknown function               | 1.75 |
| GSU0287 | HD domain protein                                     | Unknown function               | 1.66 |
| GSU2543 | polysaccharide deacetylase domain protein             | Unknown function               | 1.62 |
| GSU0754 | fibronectin type III domain protein                   | Unknown function               | 1.56 |
| GSU1354 | plasmid stabilization system family protein           | Unknown function               | 1.54 |
| GSU2525 | nitroreductase family protein                         | Unknown function               | 1.53 |
| GSU1796 | DHH family protein                                    | Unknown function               | 1.51 |

---
