# Supplementary material for: Genome-wide analysis of the RpoN regulon in Geobacter sulfurreducens
Source: PubMed Central journal article supplement (PMC2725144; doi:10.1186/1471-2164-10-331), 2009-07-22
Supplement: 1471-2164-10-331-S3.pdf [file 1471-2164-10-331-S3.pdf]

## Additional file 3

**Additional file 3.** List of 110 predicted RpoN-regulated promoters located in the noncoding regions, upstream of and in the same orientation with protein-coding genes. Sequence elements are sorted according to their PromScan scores.

| Predicted promoter | PromScan score | Start position | End position | Strand | Sequence           |
|--------------------|----------------|----------------|--------------|--------|--------------------|
| Promoter 1         | 93             | 3359799        | 3359815      | -      | CTGGCACAACGGTTGCA  |
| Promoter 2         | 93             | 1006976        | 1006992      | +      | CTGGCACGGCTCGTGCT  |
| Promoter 3         | 92             | 439442         | 439458       | +      | CTGGTACGGCTTTTGCT  |
| Promoter 4         | 92             | 3532151        | 3532167      | +      | ATGGCACGGCGTTGCT   |
| Promoter 5         | 92             | 2198355        | 2198371      | +      | ATGGCACTGTAGTTGCT  |
| Promoter 6         | 92             | 1149442        | 1149458      | +      | TTGGCATGGGCGTTGCT  |
| Promoter 7         | 91             | 3213663        | 3213679      | -      | TTGGCACCATAATTGCT  |
| Promoter 8         | 91             | 3018461        | 3018477      | -      | TTGGCCCGCCTTTTGCT  |
| Promoter 9         | 91             | 2120774        | 2120790      | +      | CTGGCACCCCTAGTTGCT |
| Promoter 10        | 91             | 1008384        | 1008400      | +      | GTGGCACGGCCTATGCT  |
| Promoter 11        | 90             | 834869         | 834885       | +      | TTGGCACAATGCTTGCC  |
| Promoter 12        | 90             | 3751277        | 3751293      | +      | GTGGCACGGTCACTGCT  |
| Promoter 13        | 90             | 3237711        | 3237727      | -      | GTGGCACTTTTGTGCA   |
| Promoter 14        | 90             | 1444460        | 1444476      | +      | TTGGCCCGCATATTGCT  |
| Promoter 15        | 89             | 650815         | 650831       | +      | TTGGCAATGCTCTTGCA  |
| Promoter 16        | 89             | 532879         | 532895       | -      | ATGGCATATATGTTGCT  |
| Promoter 17        | 88             | 897407         | 897423       | -      | CTGGCACAGGCCGTGCT  |
| Promoter 18        | 88             | 2905847        | 2905863      | -      | ATGGCCCGCCTTTTGCT  |
| Promoter 19        | 88             | 2417127        | 2417143      | -      | GTGGCAAGTTATTGCG   |
| Promoter 20        | 88             | 1342606        | 1342622      | -      | CAGGCACAGCCTTTGCT  |
| Promoter 21        | 88             | 1325893        | 1325909      | -      | TTGGCAGAGAGGTTGCT  |
| Promoter 22        | 87             | 437081         | 437097       | +      | ACGGCACGGCTTTTGCC  |
| Promoter 23        | 87             | 2210873        | 2210889      | -      | TTGGCATATGAATTGCT  |
| Promoter 24        | 87             | 1465280        | 1465296      | +      | CTGGCACGCCAATTGGA  |
| Promoter 25        | 86             | 451031         | 451047       | +      | CTGGCATTTTCGGTTGCA |
| Promoter 26        | 86             | 3555926        | 3555942      | +      | GTGGCATGCTCCATGCT  |
| Promoter 27        | 86             | 3483840        | 3483856      | +      | ATGGCAAAGCAATTGCG  |
| Promoter 28        | 86             | 3350126        | 3350142      | -      | TTGGCACATAACATGCT  |
| Promoter 29        | 86             | 3311556        | 3311572      | +      | TCGGCACGTAGGTTGCA  |
| Promoter 30        | 86             | 3105042        | 3105058      | -      | TTGGCATGGACGGTGCT  |
| Promoter 31        | 86             | 3087161        | 3087177      | -      | TTGGCACGTGGGGTGCA  |
| Promoter 32        | 86             | 2892594        | 2892610      | +      | TTGGCAAATGAATTGCT  |
| Promoter 33        | 86             | 2845669        | 2845685      | -      | TTGGTATGCCCATGCT   |
| Promoter 34        | 86             | 2715212        | 2715228      | +      | ATGGCGCAATCTTTGCA  |
| Promoter 35        | 86             | 113456         | 113472       | +      | TTGGCCCTGATGTTGCA  |
| Promoter 36        | 85             | 985792         | 985808       | -      | ATGGTACGGTACTGCA   |
| Promoter 37        | 85             | 954365         | 954381       | +      | CTGGCACGAATATCGCC  |
| Promoter 38        | 85             | 3533112        | 3533128      | +      | CCGGCACTACTGTTGCA  |
| Promoter 39        | 85             | 3494323        | 3494339      | +      | ATGGCAAAGACGTTGCG  |
| Promoter 40        | 85             | 3206537        | 3206553      | -      | TCGGCACCTCTTTTGCT  |
| Promoter 41        | 85             | 2765711        | 2765727      | -      | CTGGCATGGATATTGTT  |
| Promoter 42        | 85             | 2735628        | 2735644      | +      | ATGGTATGCAAGTTGCT  |
| Promoter 43        | 85             | 265714         | 265730       | +      | TTGGCCCGGTTTCGTGCT |
| Promoter 44        | 85             | 2234938        | 2234954      | -      | ATGGCGTGAAAATTGCT  |
| Promoter 45        | 85             | 1642205        | 1642221      | +      | TTGGTTCGGCTTTTGCT  |
| Promoter 46        | 85             | 1350361        | 1350377      | +      | ATGGCATGTTTTCTGCT  |
| Promoter 47        | 84             | 654563         | 654579       | +      | TTGGCGTGTGGTTGCA   |
| Promoter 48        | 84             | 389663         | 389679       | -      | TTGGTACGCAACCTGCT  |
| Promoter 49        | 84             | 3261819        | 3261835      | -      | CCGGCAGGGCGATTGCT  |
| Promoter 50        | 84             | 3169000        | 3169016      | -      | TTGGCTTGTTTGTGCA   |

Additional file 3

|              |    |         |         |   |                    |
|--------------|----|---------|---------|---|--------------------|
| Promoter 51  | 84 | 2620522 | 2620538 | - | ATGGAACATTGTTTTGCA |
| Promoter 52  | 84 | 2030482 | 2030498 | - | CTGGCACCGCTGTTTCA  |
| Promoter 53  | 84 | 1876861 | 1876877 | - | CTGGCCCGTGTGTTGCC  |
| Promoter 54  | 84 | 1582569 | 1582585 | - | ATGGCACTGAAATGGCA  |
| Promoter 55  | 84 | 1167017 | 1167033 | + | CTGGCCTGCTAATTGCA  |
| Promoter 56  | 84 | 1081498 | 1081514 | + | ATGGTATGCGGTTTGCA  |
| Promoter 57  | 84 | 1011401 | 1011417 | + | CTGGCATGCCTCGTGCC  |
| Promoter 58  | 83 | 999145  | 999161  | + | TTGGTACCTTGTGTTGCA |
| Promoter 59  | 83 | 619135  | 619151  | - | TTGACACTATTTTTGCA  |
| Promoter 60  | 83 | 3697242 | 3697258 | + | CTGGCATGTATATGGCA  |
| Promoter 61  | 83 | 3512615 | 3512631 | + | CAGGCCCGCTTTTTGCT  |
| Promoter 62  | 83 | 3194370 | 3194386 | - | AAGGCTCGGTTTTGCT   |
| Promoter 63  | 83 | 3093435 | 3093451 | + | AAGGCACGGAACATGCA  |
| Promoter 64  | 83 | 3027520 | 3027536 | - | TTGGTATCCCCCTTGCT  |
| Promoter 65  | 83 | 2765786 | 2765802 | + | ATGGCACTCAACTTGAA  |
| Promoter 66  | 83 | 2129841 | 2129857 | - | GTGGTACGTATTATGCT  |
| Promoter 67  | 83 | 197880  | 197896  | - | ACGGCACGACAACCTGCT |
| Promoter 68  | 83 | 1397366 | 1397382 | + | TTGGCATTGCAGCTGCT  |
| Promoter 69  | 83 | 1039939 | 1039955 | + | TTGGTATACAGGTTGCT  |
| Promoter 70  | 82 | 860308  | 860324  | - | CCGGCAAGATCATTTGCA |
| Promoter 71  | 82 | 3072482 | 3072498 | + | CTGGCAAGTGCCTTGCA  |
| Promoter 72  | 82 | 3005233 | 3005249 | + | AGGGCATCGATATTGCT  |
| Promoter 73  | 82 | 2798300 | 2798316 | - | TTCGCCCGACTATTGCT  |
| Promoter 74  | 82 | 1651315 | 1651331 | + | GTGGCGCTTGAGTTGCA  |
| Promoter 75  | 82 | 1455058 | 1455074 | + | ATGGCACGGCCTGTGTA  |
| Promoter 76  | 81 | 773999  | 774015  | + | TTGGCACGGGACATGAA  |
| Promoter 77  | 81 | 744982  | 744998  | + | TTGGTATTCAATTTGCT  |
| Promoter 78  | 81 | 628383  | 628399  | - | CTGGCATAACGGGGTGCA |
| Promoter 79  | 81 | 555596  | 555612  | - | TTGACACGCTTTGTGCT  |
| Promoter 80  | 81 | 465979  | 465995  | - | CGGGCACCGCGGTTGCC  |
| Promoter 81  | 81 | 3546239 | 3546255 | - | ACGGCAGGTAAATTTGCT |
| Promoter 82  | 81 | 3503117 | 3503133 | + | ACGGAACACTTCTTGCT  |
| Promoter 83  | 81 | 3179817 | 3179833 | - | CTGGTATATTCTTTGCT  |
| Promoter 84  | 81 | 3105888 | 3105904 | - | TTGGAACACTTTATGCT  |
| Promoter 85  | 81 | 3079447 | 3079463 | - | GTGGCACGCTTAGTGTT  |
| Promoter 86  | 81 | 2842541 | 2842557 | - | TTGGCATCCTGCCTGCT  |
| Promoter 87  | 81 | 2784628 | 2784644 | - | TTGGCATGTAAATTTGTA |
| Promoter 88  | 81 | 2597007 | 2597023 | - | CTGGCACATATCTTACG  |
| Promoter 89  | 81 | 1651206 | 1651222 | + | CTGGCATCGTCACTGCA  |
| Promoter 90  | 81 | 1523169 | 1523185 | - | GTGGCAAAGGCGCTGCA  |
| Promoter 91  | 81 | 1353732 | 1353748 | + | CTGGCATTGTTTTTGAT  |
| Promoter 92  | 81 | 1329103 | 1329119 | + | TTGGCTTCAGTATTGCA  |
| Promoter 93  | 81 | 1121057 | 1121073 | - | GCGGCACGAGATCTGCA  |
| Promoter 94  | 80 | 87167   | 87183   | - | ATGGCACGTTTTATGAA  |
| Promoter 95  | 80 | 854282  | 854298  | - | ATGCCTCGCCGCTTGCA  |
| Promoter 96  | 80 | 849091  | 849107  | - | CTGGCATTATTTTTGTT  |
| Promoter 97  | 80 | 716820  | 716836  | + | TTGGCACGAATTTTTTTT |
| Promoter 98  | 80 | 3462928 | 3462944 | + | ACGGCACCGGCATTGCC  |
| Promoter 99  | 80 | 2699909 | 2699925 | + | ACGGGACGGGGATTGCA  |
| Promoter 100 | 80 | 2247542 | 2247558 | - | AAGGCCTGAATCTTGCT  |
| Promoter 101 | 80 | 2186329 | 2186345 | + | TGGGCACAACAAATGCT  |
| Promoter 102 | 80 | 2135268 | 2135284 | - | ATGGCAAATATTTAGCT  |
| Promoter 103 | 80 | 2002713 | 2002729 | - | TAGGCAGACTATTTGCT  |
| Promoter 104 | 80 | 191151  | 191167  | + | GTGGCACCGGGTTGGCG  |

Additional file 3

|              |    |         |         |   |                    |
|--------------|----|---------|---------|---|--------------------|
| Promoter 105 | 80 | 1874885 | 1874901 | + | AGGGCAAGCTACTTGCG  |
| Promoter 106 | 80 | 1843205 | 1843221 | + | AAGGCACTGTCCTGCA   |
| Promoter 107 | 80 | 181724  | 181740  | + | TTGGAATTCGAGTTGCT  |
| Promoter 108 | 80 | 1540183 | 1540199 | + | GTCGCCCCGCACGTTGCT |
| Promoter 109 | 80 | 1380900 | 1380916 | - | TCGGCACGCATTTTGTA  |
| Promoter 110 | 80 | 1293612 | 1293628 | - | ATGGCATGCAAATGGCC  |

---
