# Supplementary material for: Genome-wide analysis of the RpoN regulon in Geobacter sulfurreducens
Source: PubMed Central journal article supplement (PMC2725144; doi:10.1186/1471-2164-10-331), 2009-07-22
Supplement: 1471-2164-10-331-S4.pdf [file 1471-2164-10-331-S4.pdf]

## Additional file 4. List of 110 predicted RpoN-regulated promoters and their target downstream genes.

Operon organization of downstream genes is listed according to the operon annotation described by Krushkal et al. (2007; Functional and Integrative Genomics 7, 229-255).

Predicted operon organization is presented as operon number in the genome-gene number in the operon. For example, **1346 Op 1** represents gene 1 in operon 1346; **1346 Op 2** represents gene 2 in Operon 1346, etc.

Tu denotes singleton open reading frames that were not predicted to be co-transcribed with other genes.

GSU, G. sulfurreducens gene identifier. COG, Clusters of Orthologous Group database identifier.

|                       |                       |              |            |               |                   |                                                                      |                                |                                     |            |
|-----------------------|-----------------------|--------------|------------|---------------|-------------------|----------------------------------------------------------------------|--------------------------------|-------------------------------------|------------|
| <b>Predicted site</b> | <b>PromScan score</b> | <b>Start</b> | <b>End</b> | <b>Strand</b> | <b>Sequence</b>   |                                                                      |                                |                                     |            |
| Promoter 1            | 93                    | 3359799      | 3359815    | -             | CTGGCACACCGGTGGCA |                                                                      |                                |                                     |            |
| <b>Operon/gene</b>    | <b>Strand</b>         | <b>Start</b> | <b>End</b> | <b>GSU</b>    | <b>Gene</b>       | <b>Annotation</b>                                                    | <b>Functional category</b>     | <b>Functional subcategory</b>       | <b>COG</b> |
| 1346 Op 1             | -                     | 3352242      | 3352952    | GSU3050       | flgA              | flagella basal body P-ring formation protein flgA, putative          | Cellular processes             | Chemotaxis and motility             | ## COG1261 |
| 1346 Op 2             | -                     | 3352996      | 3353784    | GSU3051       | flgG-1            | flagellar basal-body rod protein FlgG                                | Cellular processes             | Chemotaxis and motility             | ## COG1749 |
| 1346 Op 3             | -                     | 3353883      | 3354611    | GSU3052       | flgG-2            | flagellar basal-body rod protein FlgG                                | Cellular processes             | Chemotaxis and motility             | ## COG1749 |
| 1346 Op 4             | -                     | 3354638      | 3355390    | GSU3053       | flhA              | RNA polymerase sigma factor for flagellar Operon/gene/gene           | Transcription                  | Transcription factors               | ## COG1191 |
| 1346 Op 5             | -                     | 3355387      | 3356316    | GSU3054       | ParA              | ParA family protein                                                  | Cellular processes             | Cell division                       | ## COG0455 |
| 1346 Op 6             | -                     | 3356313      | 3357668    | GSU3055       | FlhF              | flagellar biosynthetic protein FlhF, putative                        | Cellular processes             | Chemotaxis and motility             | ## COG1419 |
| 1346 Op 7             | -                     | 3357658      | 3359748    | GSU3056       | FlhA              | flagellar biosynthetic protein FlhA                                  | Cellular processes             | Chemotaxis and motility             | ## COG1298 |
| <b>Predicted site</b> | <b>PromScan score</b> | <b>Start</b> | <b>End</b> | <b>Strand</b> | <b>Sequence</b>   |                                                                      |                                |                                     |            |
| Promoter 2            | 93                    | 1006976      | 1006992    | +             | CTGGCACGGCTCGTGCT |                                                                      |                                |                                     |            |
| <b>Operon/gene</b>    | <b>Strand</b>         | <b>Start</b> | <b>End</b> | <b>GSU</b>    | <b>Gene</b>       | <b>Annotation</b>                                                    | <b>Functional category</b>     | <b>Functional subcategory</b>       | <b>COG</b> |
| 431 Tu 1              | +                     | 1007092      | 1008243    | GSU0937       | niIV              | homocitrate synthase                                                 | Amino acid biosynthesis        | Pyruvate family                     | ## COG0119 |
| <b>Predicted site</b> | <b>PromScan score</b> | <b>Start</b> | <b>End</b> | <b>Strand</b> | <b>Sequence</b>   |                                                                      |                                |                                     |            |
| Promoter 3            | 92                    | 439442       | 439458     | +             | CTGGTACGGCTTTTGCT |                                                                      |                                |                                     |            |
| <b>Operon/gene</b>    | <b>Strand</b>         | <b>Start</b> | <b>End</b> | <b>GSU</b>    | <b>Gene</b>       | <b>Annotation</b>                                                    | <b>Functional category</b>     | <b>Functional subcategory</b>       | <b>COG</b> |
| 186 Op 1              | +                     | 439493       | 439912     | GSU0407       | flgB              | flagellar basal-body rod protein FlgB                                | Cellular processes             | Chemotaxis and motility             | ## COG1815 |
| 186 Op 2              | +                     | 439915       | 440355     | GSU0408       | flgC              | flagellar basal-body rod protein FlgC                                | Cellular processes             | Chemotaxis and motility             | ## COG1558 |
| <b>Predicted site</b> | <b>PromScan score</b> | <b>Start</b> | <b>End</b> | <b>Strand</b> | <b>Sequence</b>   |                                                                      |                                |                                     |            |
| Promoter 4            | 92                    | 3532151      | 3532167    | +             | ATGGCACCGCGTGTGCT |                                                                      |                                |                                     |            |
| <b>Operon/gene</b>    | <b>Strand</b>         | <b>Start</b> | <b>End</b> | <b>GSU</b>    | <b>Gene</b>       | <b>Annotation</b>                                                    | <b>Functional category</b>     | <b>Functional subcategory</b>       | <b>COG</b> |
| 1409 Tu 1             | +                     | 3532315      | 3533100    | GSU3221       |                   | cytochrome c family protein                                          | Energy metabolism              | Electron transport                  |            |
| <b>Predicted site</b> | <b>PromScan score</b> | <b>Start</b> | <b>End</b> | <b>Strand</b> | <b>Sequence</b>   |                                                                      |                                |                                     |            |
| Promoter 5            | 92                    | 2198355      | 2198371    | +             | ATGGCACTGTAGTTGCT |                                                                      |                                |                                     |            |
| <b>Operon/gene</b>    | <b>Strand</b>         | <b>Start</b> | <b>End</b> | <b>GSU</b>    | <b>Gene</b>       | <b>Annotation</b>                                                    | <b>Functional category</b>     | <b>Functional subcategory</b>       | <b>COG</b> |
| 913 Op 1              | +                     | 2198520      | 2199674    | GSU2005       |                   | branched-chain amino acid ABC transporter, periplasmic amino acid-bi | Transport and binding proteins | Amino acids, peptides and amines    | ## COG0683 |
| 913 Op 2              | +                     | 2199786      | 2200652    | GSU2006       |                   | branched-chain amino acid ABC transporter, permease protein          | Transport and binding proteins | Amino acids, peptides and amines    | ## COG0559 |
| 913 Op 3              | +                     | 2200668      | 2201741    | GSU2007       |                   | branched-chain amino acid ABC transporter, permease protein          | Transport and binding proteins | Amino acids, peptides and amines    | ## COG0559 |
| 913 Op 4              | +                     | 2201752      | 2202471    | GSU2008       |                   | branched-chain amino acid ABC transporter, ATP-binding protein       | Transport and binding proteins | Amino acids, peptides and amines    | ## COG0411 |
| 913 Op 5              | +                     | 2202499      | 2203203    | GSU2009       |                   | branched-chain amino acid ABC transporter, ATP-binding protein       | Transport and binding proteins | Amino acids, peptides and amines    | ## COG0410 |
| 913 Op 6              | +                     | 2203228      | 2203662    | GSU2010       |                   | CBS domain protein                                                   | Unknown function               | General                             | ## COG0517 |
| <b>Predicted site</b> | <b>PromScan score</b> | <b>Start</b> | <b>End</b> | <b>Strand</b> | <b>Sequence</b>   |                                                                      |                                |                                     |            |
| Promoter 6            | 92                    | 1149442      | 1149458    | +             | TTGGCATGGGGCTTGCT |                                                                      |                                |                                     |            |
| <b>Operon/gene</b>    | <b>Strand</b>         | <b>Start</b> | <b>End</b> | <b>GSU</b>    | <b>Gene</b>       | <b>Annotation</b>                                                    | <b>Functional category</b>     | <b>Functional subcategory</b>       | <b>COG</b> |
| 495 Op 1              | +                     | 1148603      | 1149289    | GSU1062       |                   | cytochrome c, putative                                               | Energy metabolism              | Electron transport                  |            |
| 495 Op 2              | +                     | 1149545      | 1149943    | GSU1063       |                   | hypothetical protein                                                 | Not available                  | Not available                       |            |
| <b>Predicted site</b> | <b>PromScan score</b> | <b>Start</b> | <b>End</b> | <b>Strand</b> | <b>Sequence</b>   |                                                                      |                                |                                     |            |
| Promoter 7            | 91                    | 3213663      | 3213679    | -             | TTGGCACCATTAATGCT |                                                                      |                                |                                     |            |
| <b>Operon/gene</b>    | <b>Strand</b>         | <b>Start</b> | <b>End</b> | <b>GSU</b>    | <b>Gene</b>       | <b>Annotation</b>                                                    | <b>Functional category</b>     | <b>Functional subcategory</b>       | <b>COG</b> |
| 1305 Op 1             | -                     | 3206802      | 3209942    | GSU2912       |                   | cytochrome c family protein                                          | Energy metabolism              | Electron transport                  |            |
| 1305 Op 2             | -                     | 3209979      | 3210818    | GSU2913       |                   | cytochrome c family protein                                          | Energy metabolism              | Electron transport                  |            |
| 1305 Op 3             | -                     | 3210885      | 3213479    | GSU2914       |                   | NHL repeat protein                                                   | Unknown function               | General                             |            |
| <b>Predicted site</b> | <b>PromScan score</b> | <b>Start</b> | <b>End</b> | <b>Strand</b> | <b>Sequence</b>   |                                                                      |                                |                                     |            |
| Promoter 8            | 91                    | 3018461      | 3018477    | -             | TTGGCCCGCCTTTTGCT |                                                                      |                                |                                     |            |
| <b>Operon/gene</b>    | <b>Strand</b>         | <b>Start</b> | <b>End</b> | <b>GSU</b>    | <b>Gene</b>       | <b>Annotation</b>                                                    | <b>Functional category</b>     | <b>Functional subcategory</b>       | <b>COG</b> |
| 1226 Tu 1             | -                     | 3017725      | 3018372    | GSU2741       |                   | transcriptional regulator, TetR family                               | Regulatory functions           | DNA interactions                    | ## COG1309 |
| <b>Predicted site</b> | <b>PromScan score</b> | <b>Start</b> | <b>End</b> | <b>Strand</b> | <b>Sequence</b>   |                                                                      |                                |                                     |            |
| Promoter 9            | 91                    | 2120774      | 2120790    | +             | CTGGCACCCTAGTTGCT |                                                                      |                                |                                     |            |
| <b>Operon/gene</b>    | <b>Strand</b>         | <b>Start</b> | <b>End</b> | <b>GSU</b>    | <b>Gene</b>       | <b>Annotation</b>                                                    | <b>Functional category</b>     | <b>Functional subcategory</b>       | <b>COG</b> |
| 891 Tu 1              | +                     | 2120881      | 2123244    | GSU1939       |                   | GAF domain/His Kinase A domain/HD domain protein                     | Unknown function               | General                             | ## COG2206 |
| <b>Predicted site</b> | <b>PromScan score</b> | <b>Start</b> | <b>End</b> | <b>Strand</b> | <b>Sequence</b>   |                                                                      |                                |                                     |            |
| Promoter 10           | 91                    | 1008384      | 1008400    | +             | GTGGCACGGCCTATGCT |                                                                      |                                |                                     |            |
| <b>Operon/gene</b>    | <b>Strand</b>         | <b>Start</b> | <b>End</b> | <b>GSU</b>    | <b>Gene</b>       | <b>Annotation</b>                                                    | <b>Functional category</b>     | <b>Functional subcategory</b>       | <b>COG</b> |
| 432 Op 1              | +                     | 1008591      | 1009343    | GSU0938       |                   | hypothetical protein                                                 | Not available                  | Not available                       |            |
| 432 Op 2              | +                     | 1009395      | 1009733    | GSU0939       |                   | nitrogen regulatory protein P-II, putative                           | Regulatory functions           | Protein interactions                | ## COG0347 |
| 432 Op 3              | +                     | 1009771      | 1011240    | GSU0940       |                   | ammonium transporter                                                 | Transport and binding proteins | Cations and iron carrying compounds | ## COG0004 |

|                       |                       |              |            |               |                   |                                                                 |                                |                                                 |            |
|-----------------------|-----------------------|--------------|------------|---------------|-------------------|-----------------------------------------------------------------|--------------------------------|-------------------------------------------------|------------|
| <b>Predicted site</b> | <b>PromScan score</b> | <b>Start</b> | <b>End</b> | <b>Strand</b> | <b>Sequence</b>   |                                                                 |                                |                                                 |            |
| Promoter 11           | 90                    | 834869       | 834885     | +             | TTGGCACAATGCTTGCC |                                                                 |                                |                                                 |            |
| <b>Operon/gene</b>    | <b>Strand</b>         | <b>Start</b> | <b>End</b> | <b>GSU</b>    | <b>Gene</b>       | <b>Annotation</b>                                               | <b>Functional category</b>     | <b>Functional subcategory</b>                   | <b>COG</b> |
| 351 Op 1              | +                     | 834947       | 835519     | GSU0777       | fdnG              | formate dehydrogenase, major subunit, selenocysteine-containing | Energy metabolism              | Anaerobic                                       | ## COG0243 |
| 351 Op 2              | +                     | 835568       | 837979     | GSU0777       | fdnG              | formate dehydrogenase, major subunit, selenocysteine-containing | Energy metabolism              | Anaerobic                                       | ## COG0243 |
| 351 Op 3              | +                     | 837976       | 838609     | GSU0778       | fdnH              | formate dehydrogenase, iron-sulfur subunit                      | Energy metabolism              | Anaerobic                                       | ## COG0437 |
| 351 Op 4              | +                     | 838806       | 840011     | GSU0779       |                   | formate dehydrogenase, b-type cytochrome subunit, putative      | Energy metabolism              | Anaerobic                                       |            |
| 351 Op 5              | +                     | 840072       | 841508     | GSU0780       |                   | formate dehydrogenase accessory protein FdhD                    | Energy metabolism              | Anaerobic                                       | ## COG1526 |
| 351 Op 6              | +                     | 841535       | 841714     | GSU0781       |                   | twin-arginine translocation protein, Taa/E family               | Protein fate                   | Protein and peptide secretion and trafficking   |            |
| <b>Predicted site</b> | <b>PromScan score</b> | <b>Start</b> | <b>End</b> | <b>Strand</b> | <b>Sequence</b>   |                                                                 |                                |                                                 |            |
| Promoter 12           | 90                    | 3751277      | 3751293    | +             | GTGGCACGGTCACTGCT |                                                                 |                                |                                                 |            |
| <b>Operon/gene</b>    | <b>Strand</b>         | <b>Start</b> | <b>End</b> | <b>GSU</b>    | <b>Gene</b>       | <b>Annotation</b>                                               | <b>Functional category</b>     | <b>Functional subcategory</b>                   | <b>COG</b> |
| 1499 Op 1             | +                     | 3751347      | 3751571    | GSU3409       |                   | hypothetical protein                                            | Not available                  | Not available                                   |            |
| 1499 Op 2             | +                     | 3751637      | 3751867    | GSU3410       |                   | hypothetical protein                                            | Not available                  | Not available                                   |            |
| <b>Predicted site</b> | <b>PromScan score</b> | <b>Start</b> | <b>End</b> | <b>Strand</b> | <b>Sequence</b>   |                                                                 |                                |                                                 |            |
| Promoter 13           | 90                    | 3237711      | 3237727    | -             | GTGGCACTTTTGTGCA  |                                                                 |                                |                                                 |            |
| <b>Operon/gene</b>    | <b>Strand</b>         | <b>Start</b> | <b>End</b> | <b>GSU</b>    | <b>Gene</b>       | <b>Annotation</b>                                               | <b>Functional category</b>     | <b>Functional subcategory</b>                   | <b>COG</b> |
| 1313 Op 1             | -                     | 3234566      | 3234880    | GSU2938       |                   | hypothetical protein                                            | Not available                  | Not available                                   |            |
| 1313 Op 2             | -                     | 3234820      | 3236137    | GSU2939       |                   | outer membrane porin FmdC, putative                             | Transport and binding proteins | Porins                                          |            |
| 1313 Op 3             | -                     | 3236208      | 3237614    | GSU2940       |                   | lipoprotein, putative                                           | Cell envelope                  | Other                                           | ## COG2897 |
| <b>Predicted site</b> | <b>PromScan score</b> | <b>Start</b> | <b>End</b> | <b>Strand</b> | <b>Sequence</b>   |                                                                 |                                |                                                 |            |
| Promoter 14           | 90                    | 1444460      | 1444476    | +             | TTGCCCCGCATATTGCT |                                                                 |                                |                                                 |            |
| <b>Operon/gene</b>    | <b>Strand</b>         | <b>Start</b> | <b>End</b> | <b>GSU</b>    | <b>Gene</b>       | <b>Annotation</b>                                               | <b>Functional category</b>     | <b>Functional subcategory</b>                   | <b>COG</b> |
| 610 Tu 1              | +                     | 1444534      | 1444794    | GSU1318       |                   | hypothetical protein                                            | Not available                  | Not available                                   |            |
| <b>Predicted site</b> | <b>PromScan score</b> | <b>Start</b> | <b>End</b> | <b>Strand</b> | <b>Sequence</b>   |                                                                 |                                |                                                 |            |
| Promoter 15           | 89                    | 650815       | 650831     | +             | TTGGCAATGCTCTTGCA |                                                                 |                                |                                                 |            |
| <b>Operon/gene</b>    | <b>Strand</b>         | <b>Start</b> | <b>End</b> | <b>GSU</b>    | <b>Gene</b>       | <b>Annotation</b>                                               | <b>Functional category</b>     | <b>Functional subcategory</b>                   | <b>COG</b> |
| 273 Op 1              | +                     | 650920       | 651933     | GSU0615       |                   | cytochrome c family protein                                     | Energy metabolism              | Electron transport                              |            |
| 273 Op 2              | +                     | 651948       | 652940     | GSU0616       |                   | cytochrome c family protein                                     | Energy metabolism              | Electron transport                              |            |
| 273 Op 3              | +                     | 652996       | 654081     | GSU0617       |                   | NHL repeat domain protein                                       | Unknown function               | General                                         |            |
| <b>Predicted site</b> | <b>PromScan score</b> | <b>Start</b> | <b>End</b> | <b>Strand</b> | <b>Sequence</b>   |                                                                 |                                |                                                 |            |
| Promoter 16           | 89                    | 532879       | 532895     | -             | ATGGCATATATGTTGCT |                                                                 |                                |                                                 |            |
| <b>Operon/gene</b>    | <b>Strand</b>         | <b>Start</b> | <b>End</b> | <b>GSU</b>    | <b>Gene</b>       | <b>Annotation</b>                                               | <b>Functional category</b>     | <b>Functional subcategory</b>                   | <b>COG</b> |
| 218 Op 1              | -                     | 532095       | 532700     | GSU0499       |                   | M23/M37 peptidase domain protein                                | Unknown function               | General                                         | ## COG0739 |
| 218 Op 2              | -                     | 532709       | 532840     |               |                   |                                                                 |                                |                                                 |            |
| <b>Predicted site</b> | <b>PromScan score</b> | <b>Start</b> | <b>End</b> | <b>Strand</b> | <b>Sequence</b>   |                                                                 |                                |                                                 |            |
| Promoter 17           | 88                    | 897407       | 897423     | -             | CTGGCACAGGCCGTGCT |                                                                 |                                |                                                 |            |
| <b>Operon/gene</b>    | <b>Strand</b>         | <b>Start</b> | <b>End</b> | <b>GSU</b>    | <b>Gene</b>       | <b>Annotation</b>                                               | <b>Functional category</b>     | <b>Functional subcategory</b>                   | <b>COG</b> |
| 377 Tu 1              | -                     | 896965       | 897363     | GSU0840       |                   | hypothetical protein                                            | Not available                  | Not available                                   |            |
| <b>Predicted site</b> | <b>PromScan score</b> | <b>Start</b> | <b>End</b> | <b>Strand</b> | <b>Sequence</b>   |                                                                 |                                |                                                 |            |
| Promoter 18           | 88                    | 2905847      | 2905863    | -             | ATGCCCCGCTTTTGCT  |                                                                 |                                |                                                 |            |
| <b>Operon/gene</b>    | <b>Strand</b>         | <b>Start</b> | <b>End</b> | <b>GSU</b>    | <b>Gene</b>       | <b>Annotation</b>                                               | <b>Functional category</b>     | <b>Functional subcategory</b>                   | <b>COG</b> |
| 1178 Op 1             | -                     | 2905012      | 2905347    | GSU2634       |                   | hypothetical protein                                            | Not available                  | Not available                                   |            |
| 1178 Op 2             | -                     | 2905385      | 2905804    | GSU2635       |                   | hypothetical protein                                            | Hypothetical proteins          | Conserved                                       | ## COG2703 |
| 1178 Op 3             | -                     | 2905877      | 2907730    | GSU2636       |                   | alpha-amylase family protein                                    | Energy metabolism              | Biosynthesis and degradation of polysaccharides | ## COG0366 |
| 1178 Op 4             | -                     | 2907815      | 2908801    | GSU2637       |                   | alcohol dehydrogenase, zinc-containing                          | Energy metabolism              | Fermentation                                    | ## COG0604 |
| <b>Predicted site</b> | <b>PromScan score</b> | <b>Start</b> | <b>End</b> | <b>Strand</b> | <b>Sequence</b>   |                                                                 |                                |                                                 |            |
| Promoter 19           | 88                    | 2417127      | 2417143    | -             | GTGGCAAGGTTATTGCG |                                                                 |                                |                                                 |            |
| <b>Operon/gene</b>    | <b>Strand</b>         | <b>Start</b> | <b>End</b> | <b>GSU</b>    | <b>Gene</b>       | <b>Annotation</b>                                               | <b>Functional category</b>     | <b>Functional subcategory</b>                   | <b>COG</b> |
| 1001 Tu 1             | -                     | 2416007      | 2416930    | GSU2202       |                   | transcriptional regulator, LysR family                          | Regulatory functions           | DNA interactions                                | ## COG0583 |
| <b>Predicted site</b> | <b>PromScan score</b> | <b>Start</b> | <b>End</b> | <b>Strand</b> | <b>Sequence</b>   |                                                                 |                                |                                                 |            |
| Promoter 20           | 88                    | 1342606      | 1342622    | -             | CAGGCACAGCCTTTGCT |                                                                 |                                |                                                 |            |
| <b>Operon/gene</b>    | <b>Strand</b>         | <b>Start</b> | <b>End</b> | <b>GSU</b>    | <b>Gene</b>       | <b>Annotation</b>                                               | <b>Functional category</b>     | <b>Functional subcategory</b>                   | <b>COG</b> |
| 576 Op 1              | -                     | 1337263      | 1338009    | GSU1235       |                   | hypothetical protein                                            | Hypothetical proteins          | Conserved                                       | ## COG0070 |
| 576 Op 2              | -                     | 1338075      | 1339199    | GSU1236       |                   | hypothetical protein                                            | Hypothetical proteins          | Conserved                                       | ## COG0067 |
| 576 Op 3              | -                     | 1339247      | 1340557    | GSU1237       |                   | pyridine nucleotide-disulphide oxidoreductase family protein    | Unknown function               | Enzymes of unknown specificity                  | ## COG0446 |
| 576 Op 4              | -                     | 1340554      | 1341003    | GSU1238       |                   | iron-sulfur cluster-binding protein                             | Energy metabolism              | Electron transport                              | ## COG1142 |
| 576 Op 5              | -                     | 1341008      | 1342537    | GSU1239       |                   | glutamate synthase-related protein                              | Unknown function               | General                                         | ## COG0069 |
| <b>Predicted site</b> | <b>PromScan score</b> | <b>Start</b> | <b>End</b> | <b>Strand</b> | <b>Sequence</b>   |                                                                 |                                |                                                 |            |
| Promoter 21           | 88                    | 1325893      | 1325909    | -             | TTGGCAGAGAGGTTGCT |                                                                 |                                |                                                 |            |
| <b>Operon/gene</b>    | <b>Strand</b>         | <b>Start</b> | <b>End</b> | <b>GSU</b>    | <b>Gene</b>       | <b>Annotation</b>                                               | <b>Functional category</b>     | <b>Functional subcategory</b>                   | <b>COG</b> |
| 570 Tu 1              | -                     | 1324618      | 1325838    | GSU1221       |                   | ammonium transporter, putative                                  | Transport and binding proteins | Cations and iron carrying compounds             | ## COG0004 |
| <b>Predicted site</b> | <b>PromScan score</b> | <b>Start</b> | <b>End</b> | <b>Strand</b> | <b>Sequence</b>   |                                                                 |                                |                                                 |            |
| Promoter 22           | 87                    | 437081       | 437097     | +             | ACGGCACGGCTTTTGCC |                                                                 |                                |                                                 |            |
| <b>Operon/gene</b>    | <b>Strand</b>         | <b>Start</b> | <b>End</b> | <b>GSU</b>    | <b>Gene</b>       | <b>Annotation</b>                                               | <b>Functional category</b>     | <b>Functional subcategory</b>                   | <b>COG</b> |
| 185 Tu 1              | +                     | 437169       | 439259     | GSU0406       |                   | TPR domain protein                                              | Unknown function               | General                                         |            |

|                                      |              |            |               |                    |                                                                 |                                 |                                                     |            |
|--------------------------------------|--------------|------------|---------------|--------------------|-----------------------------------------------------------------|---------------------------------|-----------------------------------------------------|------------|
| <b>Predicted site PromScan score</b> | <b>Start</b> | <b>End</b> | <b>Strand</b> | <b>Sequence</b>    |                                                                 |                                 |                                                     |            |
| Promoter 23 87                       | 2210873      | 2210889    | -             | TTGGCATATGAATTGCT  |                                                                 |                                 |                                                     |            |
| <b>Operon/gene Strand</b>            | <b>Start</b> | <b>End</b> | <b>GSU</b>    | <b>Gene</b>        | <b>Annotation</b>                                               | <b>Functional category</b>      | <b>Functional subcategory</b>                       | <b>COG</b> |
| 917 Op 1 -                           | 2208461      | 2210860    | GSU2016       |                    | sensory box/GGDEF family protein                                | Regulatory functions            | Small molecule interactions                         | ## COG2200 |
| 917 Op 2 -                           | 2210896      | 2211717    | GSU2017       |                    | hypothetical protein                                            | Hypothetical proteins           | Conserved                                           | ## COG1427 |
| <b>Predicted site PromScan score</b> | <b>Start</b> | <b>End</b> | <b>Strand</b> | <b>Sequence</b>    |                                                                 |                                 |                                                     |            |
| Promoter 24 87                       | 1465280      | 1465296    | +             | CTGGCACGCCAATTGGA  |                                                                 |                                 |                                                     |            |
| <b>Operon/gene Strand</b>            | <b>Start</b> | <b>End</b> | <b>GSU</b>    | <b>Gene</b>        | <b>Annotation</b>                                               | <b>Functional category</b>      | <b>Functional subcategory</b>                       | <b>COG</b> |
| 617 Tu 1 +                           | 1465350      | 1465754    | GSU1338       |                    | Not avail                                                       | Not available                   | Not available                                       |            |
| <b>Predicted site PromScan score</b> | <b>Start</b> | <b>End</b> | <b>Strand</b> | <b>Sequence</b>    |                                                                 |                                 |                                                     |            |
| Promoter 25 86                       | 451031       | 451047     | +             | CTGGCATTTCGGTTGCA  |                                                                 |                                 |                                                     |            |
| <b>Operon/gene Strand</b>            | <b>Start</b> | <b>End</b> | <b>GSU</b>    | <b>Gene</b>        | <b>Annotation</b>                                               | <b>Functional category</b>      | <b>Functional subcategory</b>                       | <b>COG</b> |
| 189 Op 1 +                           | 451106       | 451627     | GSU0420       |                    | flagellar protein FlL                                           | Cellular processes              | Chemotaxis and motility                             | ## COG1580 |
| 189 Op 2 +                           | 451662       | 452648     | GSU0421       | flIM               | flagellar motor switch protein FlIM                             | Cellular processes              | Chemotaxis and motility                             | ## COG1868 |
| 189 Op 3 +                           | 452645       | 452950     | GSU0422       | flIN               | flagellar motor switch protein FlIN                             | Cellular processes              | Chemotaxis and motility                             | ## COG1886 |
| 189 Op 4 +                           | 452947       | 453444     | GSU0422.1     | flIN               | flagellar motor switch protein FlIN                             | Cellular processes              | Chemotaxis and motility                             |            |
| 189 Op 5 +                           | 453450       | 454217     | GSU0423       | flIP               | flagellar biosynthetic protein FlIP                             | Cellular processes              | Chemotaxis and motility                             | ## COG1338 |
| 189 Op 6 +                           | 454230       | 454499     | GSU0424       | flIQ               | flagellar biosynthetic protein FlIQ                             | Cellular processes              | Chemotaxis and motility                             | ## COG1987 |
| 189 Op 7 +                           | 454550       | 455344     | GSU0425       | flIR               | flagellar biosynthesis protein FlIR                             | Cellular processes              | Chemotaxis and motility                             | ## COG1684 |
| 189 Op 8 +                           | 455349       | 456407     | GSU0426       | flhB               | flagellar biosynthetic protein FlhB                             | Cellular processes              | Chemotaxis and motility                             | ## COG1377 |
| <b>Predicted site PromScan score</b> | <b>Start</b> | <b>End</b> | <b>Strand</b> | <b>Sequence</b>    |                                                                 |                                 |                                                     |            |
| Promoter 26 86                       | 3555926      | 3555942    | +             | GTGGCATGCTCCACTGCT |                                                                 |                                 |                                                     |            |
| <b>Operon/gene Strand</b>            | <b>Start</b> | <b>End</b> | <b>GSU</b>    | <b>Gene</b>        | <b>Annotation</b>                                               | <b>Functional category</b>      | <b>Functional subcategory</b>                       | <b>COG</b> |
| 1416 Tu 1 +                          | 3556109      | 3556216    | GSU3242       |                    | hypothetical protein                                            | Not available                   | Not available                                       |            |
| <b>Predicted site PromScan score</b> | <b>Start</b> | <b>End</b> | <b>Strand</b> | <b>Sequence</b>    |                                                                 |                                 |                                                     |            |
| Promoter 27 86                       | 3483840      | 3483856    | +             | ATGGCAAAGCAATTGGG  |                                                                 |                                 |                                                     |            |
| <b>Operon/gene Strand</b>            | <b>Start</b> | <b>End</b> | <b>GSU</b>    | <b>Gene</b>        | <b>Annotation</b>                                               | <b>Functional category</b>      | <b>Functional subcategory</b>                       | <b>COG</b> |
| 1391 Op 1 +                          | 3483866      | 3484321    | GSU3175       |                    | hypothetical protein                                            | Not available                   | Not available                                       |            |
| 1391 Op 2 +                          | 3484361      | 3485293    | GSU3176       |                    | lysM domain protein                                             | Unknown function                | General                                             |            |
| 1391 Op 3 +                          | 3485350      | 3487443    | GSU3177       |                    | Rhs family protein                                              | Unknown function                | General                                             | ## COG3501 |
| 1391 Op 4 +                          | 3487475      | 3487750    | GSU3178       |                    | hypothetical protein                                            | Not available                   | Not available                                       |            |
| 1391 Op 5 +                          | 3487734      | 3487979    | GSU3179       |                    | hypothetical protein                                            | Hypothetical proteins           | Domain                                              |            |
| <b>Predicted site PromScan score</b> | <b>Start</b> | <b>End</b> | <b>Strand</b> | <b>Sequence</b>    |                                                                 |                                 |                                                     |            |
| Promoter 28 86                       | 3350126      | 3350142    | -             | TTGGCACATAACATGCT  |                                                                 |                                 |                                                     |            |
| <b>Operon/gene Strand</b>            | <b>Start</b> | <b>End</b> | <b>GSU</b>    | <b>Gene</b>        | <b>Annotation</b>                                               | <b>Functional category</b>      | <b>Functional subcategory</b>                       | <b>COG</b> |
| 1343 Op 1 -                          | 3345798      | 3346277    | GSU3040       |                    | hypothetical protein                                            | Hypothetical proteins           | Conserved                                           | ## COG1699 |
| 1343 Op 2 -                          | 3346282      | 3346500    | GSU3041       | csrA               | carbon storage regulator                                        | Regulatory functions            | RNA interactions                                    | ## COG1551 |
| 1343 Op 3 -                          | 3346545      | 3347441    | GSU3042       | flgL               | flagellar hook-associated protein FlgL                          | Cellular processes              | Chemotaxis and motility                             | ## COG1344 |
| 1343 Op 4 -                          | 3347451      | 3348884    | GSU3043       | flgK               | flagellar hook-associated protein FlgK                          | Cellular processes              | Chemotaxis and motility                             | ## COG1256 |
| 1343 Op 5 -                          | 3348886      | 3349377    | GSU3044       |                    | hypothetical protein                                            | Not available                   | Not available                                       |            |
| 1343 Op 6 -                          | 3349396      | 3349683    | GSU3045       | flgM               | negative regulator of flagellin synthesis FlgM                  | Regulatory functions            | DNA interactions                                    |            |
| 1343 Op 7 -                          | 3349686      | 3350066    | GSU3046       |                    | flagellar protein FlgJ-like protein                             | Cellular processes              | Chemotaxis and motility                             |            |
| <b>Predicted site PromScan score</b> | <b>Start</b> | <b>End</b> | <b>Strand</b> | <b>Sequence</b>    |                                                                 |                                 |                                                     |            |
| Promoter 29 86                       | 3311556      | 3311572    | +             | TCGGCACGTAGGTTGCA  |                                                                 |                                 |                                                     |            |
| <b>Operon/gene Strand</b>            | <b>Start</b> | <b>End</b> | <b>GSU</b>    | <b>Gene</b>        | <b>Annotation</b>                                               | <b>Functional category</b>      | <b>Functional subcategory</b>                       | <b>COG</b> |
| 1338 Op 1 +                          | 3311632      | 3311826    | GSU3017       |                    | hypothetical protein                                            | Hypothetical proteins           | Domain                                              | ## COG0673 |
| 1338 Op 2 +                          | 3311879      | 3312637    | GSU3018       |                    | hypothetical protein                                            | Hypothetical proteins           | Conserved                                           | ## COG0500 |
| 1338 Op 3 +                          | 3312678      | 3314636    | GSU3019       |                    | dehydrogenase, E1 component, alpha and beta subunits            | Unknown function                | Enzymes of unknown specificity                      | ## COG1071 |
| 1338 Op 4 +                          | 3314645      | 3315748    | GSU3020       |                    | hexapeptide transferase family protein                          | Unknown function                | Enzymes of unknown specificity                      | ## COG0110 |
| 1338 Op 5 +                          | 3315764      | 3316954    | GSU3021       |                    | DegT/DnrJ/EryC1/StS family protein                              | Unknown function                | General                                             | ## COG0399 |
| 1338 Op 6 +                          | 3316979      | 3320353    | GSU3022       |                    | hypothetical protein                                            | Not available                   | Not available                                       |            |
| 1338 Op 7 +                          | 3320365      | 3327555    | GSU3023       |                    | glycosyl transferase, group 38354 family protein                | Cell envelope                   | Biosynthesis and degradation of surface polysacchar | ## COG0438 |
| 1338 Op 8 +                          | 3327569      | 3329374    | GSU3024       |                    | hypothetical protein                                            | Not available                   | Not available                                       |            |
| 1338 Op 9 +                          | 3329371      | 3330924    | GSU3025       |                    | heptosyltransferase family protein                              | Cell envelope                   | Biosynthesis and degradation of surface polysacchar | ## COG0859 |
| 1338 Op 10 +                         | 3330990      | 3331268    | GSU3026       |                    | flagellar protein FlbD, putative                                | Cellular processes              | Chemotaxis and motility                             | ## COG1582 |
| 1338 Op 11 +                         | 3331289      | 3332053    | GSU3027       |                    | chemotaxis MotA protein                                         | Cellular processes              | Chemotaxis and motility                             | ## COG1291 |
| 1338 Op 12 +                         | 3332063      | 3332863    | GSU3028       | motB               | chemotaxis MotB protein                                         | Cellular processes              | Chemotaxis and motility                             | ## COG1360 |
| <b>Predicted site PromScan score</b> | <b>Start</b> | <b>End</b> | <b>Strand</b> | <b>Sequence</b>    |                                                                 |                                 |                                                     |            |
| Promoter 30 86                       | 3105042      | 3105058    | -             | TTGGCATGGACGGTGCT  |                                                                 |                                 |                                                     |            |
| <b>Operon/gene Strand</b>            | <b>Start</b> | <b>End</b> | <b>GSU</b>    | <b>Gene</b>        | <b>Annotation</b>                                               | <b>Functional category</b>      | <b>Functional subcategory</b>                       | <b>COG</b> |
| 1274 Tu 1 -                          | 3104018      | 3104887    | GSU2821       | nifH               | nitrogenase iron protein                                        | Central intermediary metabolism | Nitrogen fixation                                   | ## COG1348 |
| <b>Predicted site PromScan score</b> | <b>Start</b> | <b>End</b> | <b>Strand</b> | <b>Sequence</b>    |                                                                 |                                 |                                                     |            |
| Promoter 31 86                       | 3087161      | 3087177    | -             | TTGGCACGTGGGGTGCA  |                                                                 |                                 |                                                     |            |
| <b>Operon/gene Strand</b>            | <b>Start</b> | <b>End</b> | <b>GSU</b>    | <b>Gene</b>        | <b>Annotation</b>                                               | <b>Functional category</b>      | <b>Functional subcategory</b>                       | <b>COG</b> |
| 1263 Op 1 -                          | 3082277      | 3083074    | GSU2802       | dRAT               | NAD(+)-dinitrogen-reductase ADP-D-ribosyltransferase            | Central intermediary metabolism | Nitrogen fixation                                   |            |
| 1263 Op 2 -                          | 3083133      | 3083462    | GSU2803       |                    | dinitrogenase iron-molybdenum cofactor family protein           | Central intermediary metabolism | Nitrogen fixation                                   | ## COG0535 |
| 1263 Op 3 -                          | 3083491      | 3083754    | GSU2804       |                    | ferredoxin family protein                                       | Energy metabolism               | Electron transport                                  | ## COG1145 |
| 1263 Op 4 -                          | 3083822      | 3084211    | GSU2805       | nifX               | nitrogenase molybdenum-iron cofactor biosynthesis protein NifX  | Central intermediary metabolism | Nitrogen fixation                                   |            |
| 1263 Op 5 -                          | 3084293      | 3087052    | GSU2806       | nifEN              | nitrogenase molybdenum-iron cofactor biosynthesis protein NifEN | Central intermediary metabolism | Nitrogen fixation                                   | ## COG2710 |

|                       |                       |              |            |               |                                                                       |                     |                                |                                            |            |
|-----------------------|-----------------------|--------------|------------|---------------|-----------------------------------------------------------------------|---------------------|--------------------------------|--------------------------------------------|------------|
| <b>Predicted site</b> | <b>PromScan score</b> | <b>Start</b> | <b>End</b> | <b>Strand</b> | <b>Sequence</b>                                                       |                     |                                |                                            |            |
| Promoter 32           | 86                    | 2892594      | 2892610    | +             | TTGCCAAATGAATTGCT                                                     |                     |                                |                                            |            |
| <b>Operon/gene</b>    | <b>Strand</b>         | <b>Start</b> | <b>End</b> | <b>GSU</b>    | <b>Gene</b>                                                           | <b>Annotation</b>   | <b>Functional category</b>     | <b>Functional subcategory</b>              | <b>COG</b> |
| 1171 Tu 1             | +                     | 2892918      | 2895026    | GSU2622       | HAMP domain/GAF domain/HD domain protein                              |                     | Unknown function               | General                                    | ## COG2206 |
| <b>Predicted site</b> | <b>PromScan score</b> | <b>Start</b> | <b>End</b> | <b>Strand</b> | <b>Sequence</b>                                                       |                     |                                |                                            |            |
| Promoter 33           | 86                    | 2845669      | 2845685    | -             | TTGGTATGCCCATTTGCT                                                    |                     |                                |                                            |            |
| <b>Operon/gene</b>    | <b>Strand</b>         | <b>Start</b> | <b>End</b> | <b>GSU</b>    | <b>Gene</b>                                                           | <b>Annotation</b>   | <b>Functional category</b>     | <b>Functional subcategory</b>              | <b>COG</b> |
| 1151 Tu 1             | -                     | 2844288      | 2845451    | GSU2582.1     | hypothetical protein                                                  |                     | Not available                  | Not available                              |            |
| <b>Predicted site</b> | <b>PromScan score</b> | <b>Start</b> | <b>End</b> | <b>Strand</b> | <b>Sequence</b>                                                       |                     |                                |                                            |            |
| Promoter 34           | 86                    | 2715212      | 2715228    | +             | ATGGCGCAATCTTTGCA                                                     |                     |                                |                                            |            |
| <b>Operon/gene</b>    | <b>Strand</b>         | <b>Start</b> | <b>End</b> | <b>GSU</b>    | <b>Gene</b>                                                           | <b>Annotation</b>   | <b>Functional category</b>     | <b>Functional subcategory</b>              | <b>COG</b> |
| 1107 Op 1             | +                     | 2715279      | 2716979    | GSU2476       | TPR domain protein                                                    |                     | Unknown function               | General                                    | ## COG0457 |
| 1107 Op 2             | +                     | 2717042      | 2719636    | GSU2477       | TPR domain/radical SAM/B12 binding domain protein                     |                     | Unknown function               | General                                    | ## COG1032 |
| <b>Predicted site</b> | <b>PromScan score</b> | <b>Start</b> | <b>End</b> | <b>Strand</b> | <b>Sequence</b>                                                       |                     |                                |                                            |            |
| Promoter 35           | 86                    | 113456       | 113472     | +             | TTGCCCTGATGTTGCA                                                      |                     |                                |                                            |            |
| <b>Operon/gene</b>    | <b>Strand</b>         | <b>Start</b> | <b>End</b> | <b>GSU</b>    | <b>Gene</b>                                                           | <b>Annotation</b>   | <b>Functional category</b>     | <b>Functional subcategory</b>              | <b>COG</b> |
| 44 Op 1               | +                     | 113608       | 114099     | GSU0098       | MajB protein                                                          |                     | Cellular processes             | Chemotaxis and motility                    |            |
| 44 Op 2               | +                     | 114118       | 114705     | GSU0099       | MajA protein                                                          |                     | Cellular processes             | Chemotaxis and motility                    | ## COG1100 |
| <b>Predicted site</b> | <b>PromScan score</b> | <b>Start</b> | <b>End</b> | <b>Strand</b> | <b>Sequence</b>                                                       |                     |                                |                                            |            |
| Promoter 36           | 85                    | 985792       | 985808     | -             | ATGGTACGGCTACTGCA                                                     |                     |                                |                                            |            |
| <b>Operon/gene</b>    | <b>Strand</b>         | <b>Start</b> | <b>End</b> | <b>GSU</b>    | <b>Gene</b>                                                           | <b>Annotation</b>   | <b>Functional category</b>     | <b>Functional subcategory</b>              | <b>COG</b> |
| 421 Op 1              | -                     | 985247       | 985468     | GSU0919       | hypothetical protein                                                  |                     | Not available                  | Not available                              |            |
| 421 Op 2              | -                     | 985503       | 985739     | GSU0920.1     | hypothetical protein                                                  |                     | Not available                  | Not available                              |            |
| <b>Predicted site</b> | <b>PromScan score</b> | <b>Start</b> | <b>End</b> | <b>Strand</b> | <b>Sequence</b>                                                       |                     |                                |                                            |            |
| Promoter 37           | 85                    | 954365       | 954381     | +             | CTGGCACGAATATCGCC                                                     |                     |                                |                                            |            |
| <b>Operon/gene</b>    | <b>Strand</b>         | <b>Start</b> | <b>End</b> | <b>GSU</b>    | <b>Gene</b>                                                           | <b>Annotation</b>   | <b>Functional category</b>     | <b>Functional subcategory</b>              | <b>COG</b> |
| 406 Tu 1              | +                     | 954472       | 956514     | GSU0891.1     | subtilase domain protein                                              |                     | Unknown function               | General                                    | ## COG0210 |
| <b>Predicted site</b> | <b>PromScan score</b> | <b>Start</b> | <b>End</b> | <b>Strand</b> | <b>Sequence</b>                                                       |                     |                                |                                            |            |
| Promoter 38           | 85                    | 3533112      | 3533128    | +             | CCGGCACTACTGTTGCA                                                     |                     |                                |                                            |            |
| <b>Operon/gene</b>    | <b>Strand</b>         | <b>Start</b> | <b>End</b> | <b>GSU</b>    | <b>Gene</b>                                                           | <b>Annotation</b>   | <b>Functional category</b>     | <b>Functional subcategory</b>              | <b>COG</b> |
| 1410 Op 1             | +                     | 3533249      | 3534487    | GSU3222       | NHL repeat domain protein                                             |                     | Unknown function               | General                                    |            |
| 1410 Op 2             | +                     | 3534527      | 3535096    | GSU3223       | cytochrome c family protein                                           |                     | Energy metabolism              | Electron transport                         |            |
| 1410 Op 3             | +                     | 3535106      | 3537139    | GSU3224       | hypothetical protein                                                  |                     | Not available                  | Not available                              |            |
| 1410 Op 4             | +                     | 3537164      | 3538261    | GSU3225       | NHL repeat domain protein                                             |                     | Unknown function               | General                                    |            |
| 1410 Op 5             | +                     | 3538273      | 3540003    | GSU3226       | cytochrome c family protein                                           |                     | Energy metabolism              | Electron transport                         |            |
| <b>Predicted site</b> | <b>PromScan score</b> | <b>Start</b> | <b>End</b> | <b>Strand</b> | <b>Sequence</b>                                                       |                     |                                |                                            |            |
| Promoter 39           | 85                    | 3494323      | 3494339    | +             | ATGGCAAAGACGTTGGC                                                     |                     |                                |                                            |            |
| <b>Operon/gene</b>    | <b>Strand</b>         | <b>Start</b> | <b>End</b> | <b>GSU</b>    | <b>Gene</b>                                                           | <b>Annotation</b>   | <b>Functional category</b>     | <b>Functional subcategory</b>              | <b>COG</b> |
| 1394 Tu 1             | +                     | 3494464      | 3495471    | GSU3186       | hypothetical protein                                                  |                     | Hypothetical proteins          | Conserved                                  |            |
| <b>Predicted site</b> | <b>PromScan score</b> | <b>Start</b> | <b>End</b> | <b>Strand</b> | <b>Sequence</b>                                                       |                     |                                |                                            |            |
| Promoter 40           | 85                    | 3206537      | 3206553    | -             | TCGGCACCTCTTTGCT                                                      |                     |                                |                                            |            |
| <b>Operon/gene</b>    | <b>Strand</b>         | <b>Start</b> | <b>End</b> | <b>GSU</b>    | <b>Gene</b>                                                           | <b>Annotation</b>   | <b>Functional category</b>     | <b>Functional subcategory</b>              | <b>COG</b> |
| 1304 Op 1             | -                     | 3201779      | 3202648    | GSU2908       | hypothetical protein                                                  |                     | Not available                  | Not available                              |            |
| 1304 Op 2             | -                     | 3202707      | 3203264    | GSU2909       | lipoprotein, putative                                                 |                     | Cell envelope                  | Other                                      |            |
| 1304 Op 3             | -                     | 3203337      | 3204026    | GSU2910       | hypothetical protein                                                  |                     | Not available                  | Not available                              |            |
| 1304 Op 4             | -                     | 3204023      | 3206512    | GSU2911       | hypothetical protein                                                  |                     | Not available                  | Not available                              |            |
| <b>Predicted site</b> | <b>PromScan score</b> | <b>Start</b> | <b>End</b> | <b>Strand</b> | <b>Sequence</b>                                                       |                     |                                |                                            |            |
| Promoter 41           | 85                    | 2765711      | 2765727    | -             | CTGGCATGGATATTGTT                                                     |                     |                                |                                            |            |
| <b>Operon/gene</b>    | <b>Strand</b>         | <b>Start</b> | <b>End</b> | <b>GSU</b>    | <b>Gene</b>                                                           | <b>Annotation</b>   | <b>Functional category</b>     | <b>Functional subcategory</b>              | <b>COG</b> |
| 1121 Op 1             | -                     | 2762042      | 2763736    | GSU2506       | sensory box protein/sigma-54 dependent DNA-binding response regulator | Signal transduction | Signal transduction            | Two-component systems                      | ## COG3829 |
| 1121 Op 2             | -                     | 2763705      | 2765570    | GSU2507       | sensor histidine kinase                                               | Signal transduction | Signal transduction            | Two-component systems                      | ## COG0642 |
| <b>Predicted site</b> | <b>PromScan score</b> | <b>Start</b> | <b>End</b> | <b>Strand</b> | <b>Sequence</b>                                                       |                     |                                |                                            |            |
| Promoter 42           | 85                    | 2735628      | 2735644    | +             | ATGGTATGCAAGTTGCT                                                     |                     |                                |                                            |            |
| <b>Operon/gene</b>    | <b>Strand</b>         | <b>Start</b> | <b>End</b> | <b>GSU</b>    | <b>Gene</b>                                                           | <b>Annotation</b>   | <b>Functional category</b>     | <b>Functional subcategory</b>              | <b>COG</b> |
| 1114 Tu 1             | +                     | 2735710      | 2737077    | GSU2490       | oxalate/formate antiporter, putative                                  |                     | Transport and binding proteins | Carbohydrates, organic alcohols, and acids | ## COG0477 |
| <b>Predicted site</b> | <b>PromScan score</b> | <b>Start</b> | <b>End</b> | <b>Strand</b> | <b>Sequence</b>                                                       |                     |                                |                                            |            |
| Promoter 43           | 85                    | 265714       | 265730     | +             | TTGCCCGGTTCTGCTC                                                      |                     |                                |                                            |            |
| <b>Operon/gene</b>    | <b>Strand</b>         | <b>Start</b> | <b>End</b> | <b>GSU</b>    | <b>Gene</b>                                                           | <b>Annotation</b>   | <b>Functional category</b>     | <b>Functional subcategory</b>              | <b>COG</b> |
| 119 Tu 1              | +                     | 265796       | 266233     | GSU0256       | hypothetical protein                                                  |                     | Hypothetical proteins          | Conserved                                  | ## COG2703 |

|                       |                       |              |            |               |                   |                                                                  |                                |                               |            |
|-----------------------|-----------------------|--------------|------------|---------------|-------------------|------------------------------------------------------------------|--------------------------------|-------------------------------|------------|
| <b>Predicted site</b> | <b>PromScan score</b> | <b>Start</b> | <b>End</b> | <b>Strand</b> | <b>Sequence</b>   |                                                                  |                                |                               |            |
| Promoter 44           | 85                    | 2234938      | 2234954    | -             | ATGCCGTGAAAATTGCT |                                                                  |                                |                               |            |
| <b>Operon/gene</b>    | <b>Strand</b>         | <b>Start</b> | <b>End</b> | <b>GSU</b>    | <b>Gene</b>       | <b>Annotation</b>                                                | <b>Functional category</b>     | <b>Functional subcategory</b> | <b>COG</b> |
| 922 Op 1              | -                     | 2226192      | 2226845    | GSU2034       |                   | hypothetical protein                                             | Not available                  | Not available                 |            |
| 922 Op 2              | -                     | 2228863      | 2228044    | GSU2035       |                   | hypothetical protein                                             | Not available                  | Not available                 |            |
| 922 Op 3              | -                     | 2228053      | 2228442    | GSU2036       |                   | hypothetical protein                                             | Not available                  | Not available                 |            |
| 922 Op 4              | -                     | 2228420      | 2228905    | GSU2037       |                   | hypothetical protein                                             | Not available                  | Not available                 |            |
| 922 Op 5              | -                     | 2228907      | 2234492    | GSU2038       |                   | hypothetical protein                                             | Not available                  | Not available                 | ## COG3419 |
| 922 Op 6              | -                     | 2234591      | 2234893    | GSU2039       |                   | hypothetical protein                                             | Not available                  | Not available                 |            |
| <b>Predicted site</b> | <b>PromScan score</b> | <b>Start</b> | <b>End</b> | <b>Strand</b> | <b>Sequence</b>   |                                                                  |                                |                               |            |
| Promoter 45           | 85                    | 1642205      | 1642221    | +             | TTGGTTCGGCTTTTGCT |                                                                  |                                |                               |            |
| <b>Operon/gene</b>    | <b>Strand</b>         | <b>Start</b> | <b>End</b> | <b>GSU</b>    | <b>Gene</b>       | <b>Annotation</b>                                                | <b>Functional category</b>     | <b>Functional subcategory</b> | <b>COG</b> |
| 688 Op 1              | +                     | 1642314      | 1642529    | GSU1496       |                   | pilin domain protein                                             | Unknown function               | General                       | ## COG2165 |
| 688 Op 2              | +                     | 1642557      | 1642931    | GSU1497       |                   | hypothetical protein                                             | Not available                  | Not available                 |            |
| <b>Predicted site</b> | <b>PromScan score</b> | <b>Start</b> | <b>End</b> | <b>Strand</b> | <b>Sequence</b>   |                                                                  |                                |                               |            |
| Promoter 46           | 85                    | 1350361      | 1350377    | +             | ATGCCATGTTTTCTGCT |                                                                  |                                |                               |            |
| <b>Operon/gene</b>    | <b>Strand</b>         | <b>Start</b> | <b>End</b> | <b>GSU</b>    | <b>Gene</b>       | <b>Annotation</b>                                                | <b>Functional category</b>     | <b>Functional subcategory</b> | <b>COG</b> |
| 582 Op 1              | +                     | 1350455      | 1352029    | GSU1249       |                   | sensory box histidine kinase                                     | Signal transduction            | Two-component systems         | ## COG0642 |
| 582 Op 2              | +                     | 1352057      | 1353466    | GSU1250       |                   | sigma-54 dependent DNA-binding response regulator                | Signal transduction            | Two-component systems         | ## COG2204 |
| <b>Predicted site</b> | <b>PromScan score</b> | <b>Start</b> | <b>End</b> | <b>Strand</b> | <b>Sequence</b>   |                                                                  |                                |                               |            |
| Promoter 47           | 84                    | 654563       | 654579     | +             | TTGGCGTGGTGTGCA   |                                                                  |                                |                               |            |
| <b>Operon/gene</b>    | <b>Strand</b>         | <b>Start</b> | <b>End</b> | <b>GSU</b>    | <b>Gene</b>       | <b>Annotation</b>                                                | <b>Functional category</b>     | <b>Functional subcategory</b> | <b>COG</b> |
| 274 Tu 1              | +                     | 654657       | 655355     | GSU0618       |                   | cytochrome c family protein                                      | Energy metabolism              | Electron transport            |            |
| <b>Predicted site</b> | <b>PromScan score</b> | <b>Start</b> | <b>End</b> | <b>Strand</b> | <b>Sequence</b>   |                                                                  |                                |                               |            |
| Promoter 48           | 84                    | 389663       | 389679     | -             | TTGGTACGCAACCTGCT |                                                                  |                                |                               |            |
| <b>Operon/gene</b>    | <b>Strand</b>         | <b>Start</b> | <b>End</b> | <b>GSU</b>    | <b>Gene</b>       | <b>Annotation</b>                                                | <b>Functional category</b>     | <b>Functional subcategory</b> | <b>COG</b> |
| 160 Op 1              | -                     | 387351       | 388952     | GSU0357       |                   | cytochrome c family protein                                      | Energy metabolism              | Electron transport            | ## COG3303 |
| 160 Op 2              | -                     | 388985       | 389488     | GSU0358       |                   | iron-sulfur cluster-binding protein                              | Energy metabolism              | Electron transport            | ## COG1145 |
| <b>Predicted site</b> | <b>PromScan score</b> | <b>Start</b> | <b>End</b> | <b>Strand</b> | <b>Sequence</b>   |                                                                  |                                |                               |            |
| Promoter 49           | 84                    | 3261819      | 3261835    | -             | CCGGCAGGGCGATTGCT |                                                                  |                                |                               |            |
| <b>Operon/gene</b>    | <b>Strand</b>         | <b>Start</b> | <b>End</b> | <b>GSU</b>    | <b>Gene</b>       | <b>Annotation</b>                                                | <b>Functional category</b>     | <b>Functional subcategory</b> | <b>COG</b> |
| 1321 Tu 1             | -                     | 3261189      | 3261737    | GSU2965       |                   | hypothetical protein                                             | Hypothetical proteins          | Conserved                     |            |
| <b>Predicted site</b> | <b>PromScan score</b> | <b>Start</b> | <b>End</b> | <b>Strand</b> | <b>Sequence</b>   |                                                                  |                                |                               |            |
| Promoter 50           | 84                    | 3169000      | 3169016    | -             | TTGGCTGTTTGTGCA   |                                                                  |                                |                               |            |
| <b>Operon/gene</b>    | <b>Strand</b>         | <b>Start</b> | <b>End</b> | <b>GSU</b>    | <b>Gene</b>       | <b>Annotation</b>                                                | <b>Functional category</b>     | <b>Functional subcategory</b> | <b>COG</b> |
| 1293 Op 1             | -                     | 3163008      | 3166124    | GSU2884       |                   | cytochrome c family protein                                      | Energy metabolism              | Electron transport            |            |
| 1293 Op 2             | -                     | 3166135      | 3168801    | GSU2885       |                   | NHL repeat domain protein                                        | Unknown function               | General                       |            |
| <b>Predicted site</b> | <b>PromScan score</b> | <b>Start</b> | <b>End</b> | <b>Strand</b> | <b>Sequence</b>   |                                                                  |                                |                               |            |
| Promoter 51           | 84                    | 2620522      | 2620538    | -             | ATGGAACATTGTTTGCA |                                                                  |                                |                               |            |
| <b>Operon/gene</b>    | <b>Strand</b>         | <b>Start</b> | <b>End</b> | <b>GSU</b>    | <b>Gene</b>       | <b>Annotation</b>                                                | <b>Functional category</b>     | <b>Functional subcategory</b> | <b>COG</b> |
| 1058 Op 1             | -                     | 2606832      | 2607443    | GSU2378       | trpF              | N-(5-phosphoribosyl)anthranilate isomerase                       | Amino acid biosynthesis        | Aromatic amino acid family    | ## COG0135 |
| 1058 Op 2             | -                     | 2607448      | 2608803    | GSU2379       |                   | pyridoxal-phosphate dependent enzyme                             | Amino acid biosynthesis        | Aromatic amino acid family    | ## COG1350 |
| 1058 Op 3             | -                     | 2608851      | 2609651    | GSU2380       | trpC              | Indole-3-glycerol phosphate synthase                             | Amino acid biosynthesis        | Aromatic amino acid family    | ## COG0134 |
| 1058 Op 4             | -                     | 2609656      | 2610708    | GSU2381       | trpD              | anthranilate phosphoribosyltransferase                           | Amino acid biosynthesis        | Aromatic amino acid family    | ## COG0547 |
| 1058 Op 5             | -                     | 2610773      | 2611345    | GSU2382       | trpG              | anthranilate synthase component II                               | Amino acid biosynthesis        | Aromatic amino acid family    | ## COG0512 |
| 1058 Op 6             | -                     | 2611347      | 2612822    | GSU2383       | trpE              | anthranilate synthase component I                                | Amino acid biosynthesis        | Aromatic amino acid family    | ## COG0147 |
| 1058 Op 7             | -                     | 2612913      | 2614757    | GSU2384       |                   | sensor histidine kinase                                          | Signal transduction            | Two-component systems         | ## COG0642 |
| 1058 Op 8             | -                     | 2614738      | 2615343    | GSU2385       |                   | hypothetical protein                                             | Not available                  | Not available                 |            |
| 1058 Op 9             | -                     | 2615333      | 2616358    | GSU2386       |                   | methylcobamide:CoM methyltransferase-related protein             | Unknown function               | General                       |            |
| 1058 Op 10            | -                     | 2616355      | 2617035    | GSU2387       |                   | B12-binding domain                                               | Unknown function               | General                       | ## COG1410 |
| 1058 Op 11            | -                     | 2617037      | 2619238    | GSU2388       |                   | sensory box histidine kinase                                     | Signal transduction            | Two-component systems         | ## COG0642 |
| 1058 Op 12            | -                     | 2619301      | 2620449    | GSU2389       |                   | ABC transporter, periplasmic substrate-binding protein, putative | Transport and binding proteins | Unknown substrate             | ## COG0683 |
| <b>Predicted site</b> | <b>PromScan score</b> | <b>Start</b> | <b>End</b> | <b>Strand</b> | <b>Sequence</b>   |                                                                  |                                |                               |            |
| Promoter 52           | 84                    | 2030482      | 2030498    | -             | CTGGCACCGCTGTTTCA |                                                                  |                                |                               |            |
| <b>Operon/gene</b>    | <b>Strand</b>         | <b>Start</b> | <b>End</b> | <b>GSU</b>    | <b>Gene</b>       | <b>Annotation</b>                                                | <b>Functional category</b>     | <b>Functional subcategory</b> | <b>COG</b> |
| 858 Tu 1              | -                     | 2030029      | 2030142    | GSU1855.2     |                   | capsule polysaccharide export protein, putative                  | Transport and binding proteins | Other                         |            |
| <b>Predicted site</b> | <b>PromScan score</b> | <b>Start</b> | <b>End</b> | <b>Strand</b> | <b>Sequence</b>   |                                                                  |                                |                               |            |
| Promoter 53           | 84                    | 1876861      | 1876877    | -             | CTGCCCGTGTGTTGCC  |                                                                  |                                |                               |            |
| <b>Operon/gene</b>    | <b>Strand</b>         | <b>Start</b> | <b>End</b> | <b>GSU</b>    | <b>Gene</b>       | <b>Annotation</b>                                                | <b>Functional category</b>     | <b>Functional subcategory</b> | <b>COG</b> |
| 793 Tu 1              | -                     | 1876494      | 1876634    |               |                   |                                                                  |                                |                               |            |
| <b>Predicted site</b> | <b>PromScan score</b> | <b>Start</b> | <b>End</b> | <b>Strand</b> | <b>Sequence</b>   |                                                                  |                                |                               |            |
| Promoter 54           | 84                    | 1582569      | 1582585    | -             | ATGGCACTGAAATGGCA |                                                                  |                                |                               |            |
| <b>Operon/gene</b>    | <b>Strand</b>         | <b>Start</b> | <b>End</b> | <b>GSU</b>    | <b>Gene</b>       | <b>Annotation</b>                                                | <b>Functional category</b>     | <b>Functional subcategory</b> | <b>COG</b> |
| 671 Op 1              | -                     | 1579416      | 1581380    | GSU1443       |                   | sensor histidine kinase/response regulator                       | Signal transduction            | Two-component systems         | ## COG0642 |
| 671 Op 2              | -                     | 1581389      | 1582282    | GSU1444       |                   | hypothetical protein                                             | Hypothetical proteins          | Conserved                     | ## COG2984 |
| 671 Op 3              | -                     | 1582289      | 1582393    |               |                   |                                                                  |                                |                               |            |

|                |                |         |         |         |                   |                                                         |                                |                                            |     |            |
|----------------|----------------|---------|---------|---------|-------------------|---------------------------------------------------------|--------------------------------|--------------------------------------------|-----|------------|
| Predicted site | PromScan score | Start   | End     | Strand  | Sequence          |                                                         |                                |                                            |     |            |
| Promoter 55    | 84             | 1167017 | 1167033 | +       | CTGGCCTGCTAATTGCA |                                                         |                                |                                            |     |            |
| Operon/gene    | Strand         | Start   | End     | GSU     | Gene              | Annotation                                              | Functional category            | Functional subcategory                     | COG |            |
| 804 Tu 1       | +              | 1167082 | 1167798 | GSU1079 |                   | hypothetical protein                                    | Not available                  | Not available                              |     |            |
| Predicted site | PromScan score | Start   | End     | Strand  | Sequence          |                                                         |                                |                                            |     |            |
| Promoter 56    | 84             | 1081498 | 1081514 | +       | ATGGTATGCGTTTGCA  |                                                         |                                |                                            |     |            |
| Operon/gene    | Strand         | Start   | End     | GSU     | Gene              | Annotation                                              | Functional category            | Functional subcategory                     | COG |            |
| 462 Tu 1       | +              | 1081683 | 1082066 | GSU1001 |                   | hypothetical protein                                    | Not available                  | Not available                              |     |            |
| Predicted site | PromScan score | Start   | End     | Strand  | Sequence          |                                                         |                                |                                            |     |            |
| Promoter 57    | 84             | 1011401 | 1011417 | +       | CTGGCATGCCTCGTGCC |                                                         |                                |                                            |     |            |
| Operon/gene    | Strand         | Start   | End     | GSU     | Gene              | Annotation                                              | Functional category            | Functional subcategory                     | COG |            |
| 433 Tu 1       | +              | 1011471 | 1012217 | GSU0941 |                   | sensor histidine kinase, putative                       | Signal transduction            | Two-component systems                      |     | ## COG0642 |
| Predicted site | PromScan score | Start   | End     | Strand  | Sequence          |                                                         |                                |                                            |     |            |
| Promoter 58    | 83             | 999145  | 999161  | +       | TTGGTACCTGTTTGCA  |                                                         |                                |                                            |     |            |
| Operon/gene    | Strand         | Start   | End     | GSU     | Gene              | Annotation                                              | Functional category            | Functional subcategory                     | COG |            |
| 425 Tu 1       | +              | 999205  | 999729  | GSU0930 |                   | sulfur transferase, putative, selenocysteine-containing | Unknown function               | General                                    |     |            |
| Predicted site | PromScan score | Start   | End     | Strand  | Sequence          |                                                         |                                |                                            |     |            |
| Promoter 59    | 83             | 619135  | 619151  | -       | TTGACACTATTTTGCA  |                                                         |                                |                                            |     |            |
| Operon/gene    | Strand         | Start   | End     | GSU     | Gene              | Annotation                                              | Functional category            | Functional subcategory                     | COG |            |
| 258 Tu 1       | -              | 617517  | 618791  | GSU0584 |                   | hypothetical protein                                    | Not available                  | Not available                              |     |            |
| Predicted site | PromScan score | Start   | End     | Strand  | Sequence          |                                                         |                                |                                            |     |            |
| Promoter 60    | 83             | 3697242 | 3697258 | +       | CTGGCATGTATATGGCA |                                                         |                                |                                            |     |            |
| Operon/gene    | Strand         | Start   | End     | GSU     | Gene              | Annotation                                              | Functional category            | Functional subcategory                     | COG |            |
| 1478 Tu 1      | +              | 3697317 | 3697505 | GSU3364 |                   | hypothetical protein                                    | Not available                  | Not available                              |     |            |
| Predicted site | PromScan score | Start   | End     | Strand  | Sequence          |                                                         |                                |                                            |     |            |
| Promoter 61    | 83             | 3512615 | 3512631 | +       | CAGGCCCGCTTTTGCT  |                                                         |                                |                                            |     |            |
| Operon/gene    | Strand         | Start   | End     | GSU     | Gene              | Annotation                                              | Functional category            | Functional subcategory                     | COG |            |
| 1402 Tu 1      | +              | 3512703 | 3513122 | GSU3206 |                   | dnaK suppressor protein, putative                       | Regulatory functions           | DNA interactions                           |     | ## COG1734 |
| Predicted site | PromScan score | Start   | End     | Strand  | Sequence          |                                                         |                                |                                            |     |            |
| Promoter 62    | 83             | 3194370 | 3194386 | -       | AAGGCTCGGTTTTGCT  |                                                         |                                |                                            |     |            |
| Operon/gene    | Strand         | Start   | End     | GSU     | Gene              | Annotation                                              | Functional category            | Functional subcategory                     | COG |            |
| 1302 Op 1      | -              | 3182745 | 3191156 | GSU2898 |                   | high-molecular-weight cytochrome c                      | Energy metabolism              | Electron transport                         |     |            |
| 1302 Op 2      | -              | 3191201 | 3194140 | GSU2899 |                   | high-molecular-weight cytochrome c                      | Energy metabolism              | Electron transport                         |     |            |
| Predicted site | PromScan score | Start   | End     | Strand  | Sequence          |                                                         |                                |                                            |     |            |
| Promoter 63    | 83             | 3093435 | 3093451 | +       | AAGGCACGGAACATGCA |                                                         |                                |                                            |     |            |
| Operon/gene    | Strand         | Start   | End     | GSU     | Gene              | Annotation                                              | Functional category            | Functional subcategory                     | COG |            |
| 1269 Tu 1      | +              | 3093614 | 3095863 | GSU2815 |                   | sensory box histidine kinase                            | Signal transduction            | Two-component systems                      |     | ## COG0642 |
| Predicted site | PromScan score | Start   | End     | Strand  | Sequence          |                                                         |                                |                                            |     |            |
| Promoter 64    | 83             | 3027520 | 3027536 | -       | TTGGTATCCCCCTTGCT |                                                         |                                |                                            |     |            |
| Operon/gene    | Strand         | Start   | End     | GSU     | Gene              | Annotation                                              | Functional category            | Functional subcategory                     | COG |            |
| 1232 Op 1      | -              | 3025675 | 3026046 | GSU2750 |                   | hypothetical protein                                    | Hypothetical proteins          | Domain                                     |     |            |
| 1232 Op 2      | -              | 3026124 | 3027449 | GSU2751 | dcuB              | C4-dicarboxylate transporter, anaerobic                 | Transport and binding proteins | Carbohydrates, organic alcohols, and acids |     | ## COG2704 |
| Predicted site | PromScan score | Start   | End     | Strand  | Sequence          |                                                         |                                |                                            |     |            |
| Promoter 65    | 83             | 2765786 | 2765802 | +       | ATGGCACTCAACTTGAA |                                                         |                                |                                            |     |            |
| Operon/gene    | Strand         | Start   | End     | GSU     | Gene              | Annotation                                              | Functional category            | Functional subcategory                     | COG |            |
| 1122 Tu 1      | +              | 2765849 | 2767465 | GSU2508 |                   | TPR domain protein                                      | Unknown function               | General                                    |     |            |
| Predicted site | PromScan score | Start   | End     | Strand  | Sequence          |                                                         |                                |                                            |     |            |
| Promoter 66    | 83             | 2129841 | 2129857 | -       | GTGGTACGTATTATGCT |                                                         |                                |                                            |     |            |
| Operon/gene    | Strand         | Start   | End     | GSU     | Gene              | Annotation                                              | Functional category            | Functional subcategory                     | COG |            |
| 894 Tu 1       | -              | 2128966 | 2129685 | GSU1944 |                   | hypothetical protein                                    | Not available                  | Not available                              |     |            |
| Predicted site | PromScan score | Start   | End     | Strand  | Sequence          |                                                         |                                |                                            |     |            |
| Promoter 67    | 83             | 197880  | 197896  | -       | ACGGCACGACAACGTCT |                                                         |                                |                                            |     |            |
| Operon/gene    | Strand         | Start   | End     | GSU     | Gene              | Annotation                                              | Functional category            | Functional subcategory                     | COG |            |
| 87 Op 1        | -              | 196023  | 196325  | GSU0182 |                   | lipoprotein, putative                                   | Cell envelope                  | Other                                      |     |            |
| 87 Op 2        | -              | 196424  | 197731  | GSU0183 |                   | lipoprotein, putative                                   | Cell envelope                  | Other                                      |     | ## COG1376 |
| Predicted site | PromScan score | Start   | End     | Strand  | Sequence          |                                                         |                                |                                            |     |            |
| Promoter 68    | 83             | 1397366 | 1397382 | +       | TTGGCATTGCAGCTGCT |                                                         |                                |                                            |     |            |
| Operon/gene    | Strand         | Start   | End     | GSU     | Gene              | Annotation                                              | Functional category            | Functional subcategory                     | COG |            |
| 583 Tu 1       | +              | 1397632 | 1398942 | GSU1282 |                   | hypothetical protein                                    | Not available                  | Not available                              |     |            |

|                       |                       |              |            |               |                   |                                                                  |                                |                                     |            |            |
|-----------------------|-----------------------|--------------|------------|---------------|-------------------|------------------------------------------------------------------|--------------------------------|-------------------------------------|------------|------------|
| <b>Predicted site</b> | <b>PromScan score</b> | <b>Start</b> | <b>End</b> | <b>Strand</b> | <b>Sequence</b>   |                                                                  |                                |                                     |            |            |
| Promoter 69           | 83                    | 1039939      | 1039955    | +             | TTGGTATACAGGTTGCT |                                                                  |                                |                                     |            |            |
| <b>Operon/gene</b>    | <b>Strand</b>         | <b>Start</b> | <b>End</b> | <b>GSU</b>    | <b>Gene</b>       | <b>Annotation</b>                                                | <b>Functional category</b>     | <b>Functional subcategory</b>       | <b>COG</b> |            |
| 449 Op 1              | +                     | 1040081      | 1040272    | GSU0964       |                   | hypothetical protein                                             | Not available                  | Not available                       |            |            |
| 449 Op 2              | +                     | 1040294      | 1040416    |               |                   |                                                                  |                                |                                     |            |            |
| 449 Op 3              | +                     | 1040397      | 1040648    | GSU0966       |                   | hypothetical protein                                             | Not available                  | Not available                       |            |            |
| 449 Op 4              | +                     | 1040661      | 1041713    | GSU0967       |                   | membrane protein, putative                                       | Cell envelope                  | Other                               |            |            |
| <b>Predicted site</b> | <b>PromScan score</b> | <b>Start</b> | <b>End</b> | <b>Strand</b> | <b>Sequence</b>   |                                                                  |                                |                                     |            |            |
| Promoter 70           | 82                    | 860308       | 860324     | -             | CCGGCAAGATCATTGCA |                                                                  |                                |                                     |            |            |
| <b>Operon/gene</b>    | <b>Strand</b>         | <b>Start</b> | <b>End</b> | <b>GSU</b>    | <b>Gene</b>       | <b>Annotation</b>                                                | <b>Functional category</b>     | <b>Functional subcategory</b>       | <b>COG</b> |            |
| 359 Tu 1              | -                     | 858649       | 860052     | GSU0801       |                   | hypothetical protein                                             | Not available                  | Not available                       |            |            |
| <b>Predicted site</b> | <b>PromScan score</b> | <b>Start</b> | <b>End</b> | <b>Strand</b> | <b>Sequence</b>   |                                                                  |                                |                                     |            |            |
| Promoter 71           | 82                    | 3072482      | 3072498    | +             | CTGGCAAGTGCCCTGCA |                                                                  |                                |                                     |            |            |
| <b>Operon/gene</b>    | <b>Strand</b>         | <b>Start</b> | <b>End</b> | <b>GSU</b>    | <b>Gene</b>       | <b>Annotation</b>                                                | <b>Functional category</b>     | <b>Functional subcategory</b>       | <b>COG</b> |            |
| 1259 Tu 1             | +                     | 3072594      | 3073025    | GSU2794       | mscL              | large conductance mechanosensitive channel protein               | Cellular processes             | Adaptations to atypical conditions  |            | ## COG1970 |
| <b>Predicted site</b> | <b>PromScan score</b> | <b>Start</b> | <b>End</b> | <b>Strand</b> | <b>Sequence</b>   |                                                                  |                                |                                     |            |            |
| Promoter 72           | 82                    | 3005233      | 3005249    | +             | AGGGCATCGATATTGCT |                                                                  |                                |                                     |            |            |
| <b>Operon/gene</b>    | <b>Strand</b>         | <b>Start</b> | <b>End</b> | <b>GSU</b>    | <b>Gene</b>       | <b>Annotation</b>                                                | <b>Functional category</b>     | <b>Functional subcategory</b>       | <b>COG</b> |            |
| 1220 Tu 1             | +                     | 3005347      | 3005799    | GSU2727       |                   | hypothetical protein                                             | Not available                  | Not available                       |            |            |
| <b>Predicted site</b> | <b>PromScan score</b> | <b>Start</b> | <b>End</b> | <b>Strand</b> | <b>Sequence</b>   |                                                                  |                                |                                     |            |            |
| Promoter 73           | 82                    | 2798300      | 2798316    | -             | TTCGCCCGACTATTGCT |                                                                  |                                |                                     |            |            |
| <b>Operon/gene</b>    | <b>Strand</b>         | <b>Start</b> | <b>End</b> | <b>GSU</b>    | <b>Gene</b>       | <b>Annotation</b>                                                | <b>Functional category</b>     | <b>Functional subcategory</b>       | <b>COG</b> |            |
| 1134 Op 1             | -                     | 2791476      | 2794637    | GSU2531       |                   | sensory box histidine kinase                                     | Signal transduction            | Two-component systems               |            | ## COG0642 |
| 1134 Op 2             | -                     | 2794634      | 2795065    | GSU2532       |                   | hypothetical protein                                             | Not available                  | Conserved                           |            |            |
| 1134 Op 3             | -                     | 2795087      | 2796298    | GSU2533       |                   | hypothetical protein                                             | Not available                  | Not available                       |            |            |
| 1134 Op 4             | -                     | 2796313      | 2797671    | GSU2534       |                   | sensory box/response regulator                                   | Signal transduction            | Two-component systems               |            | ## COG2199 |
| 1134 Op 5             | -                     | 2797751      | 2798254    | GSU2535       |                   | response regulator                                               | Signal transduction            | Two-component systems               |            | ## COG0784 |
| <b>Predicted site</b> | <b>PromScan score</b> | <b>Start</b> | <b>End</b> | <b>Strand</b> | <b>Sequence</b>   |                                                                  |                                |                                     |            |            |
| Promoter 74           | 82                    | 1651315      | 1651331    | +             | GTGGCGCTTGAGTTGCA |                                                                  |                                |                                     |            |            |
| <b>Operon/gene</b>    | <b>Strand</b>         | <b>Start</b> | <b>End</b> | <b>GSU</b>    | <b>Gene</b>       | <b>Annotation</b>                                                | <b>Functional category</b>     | <b>Functional subcategory</b>       | <b>COG</b> |            |
| 691 Tu 1              | +                     | 1651532      | 1652161    | GSU1506       |                   | hypothetical protein                                             | Not available                  | Not available                       |            |            |
| <b>Predicted site</b> | <b>PromScan score</b> | <b>Start</b> | <b>End</b> | <b>Strand</b> | <b>Sequence</b>   |                                                                  |                                |                                     |            |            |
| Promoter 75           | 82                    | 1455058      | 1455074    | +             | ATGGCACGGCCTGTGA  |                                                                  |                                |                                     |            |            |
| <b>Operon/gene</b>    | <b>Strand</b>         | <b>Start</b> | <b>End</b> | <b>GSU</b>    | <b>Gene</b>       | <b>Annotation</b>                                                | <b>Functional category</b>     | <b>Functional subcategory</b>       | <b>COG</b> |            |
| 614 Op 1              | +                     | 1455116      | 1456396    | GSU1330       |                   | metal ion efflux outer membrane protein family protein, putative | Transport and binding proteins | Cations and iron carrying compounds |            | ## COG1538 |
| 614 Op 2              | +                     | 1456441      | 1457775    | GSU1331       |                   | efflux transporter, RND family, MFP subunit                      | Transport and binding proteins | Unknown substrate                   |            | ## COG0845 |
| 614 Op 3              | +                     | 1457786      | 1460923    | GSU1332       |                   | heavy metal efflux pump, CzcA family                             | Transport and binding proteins | Cations and iron carrying compounds |            | ## COG3696 |
| 614 Op 4              | +                     | 1460959      | 1461432    | GSU1333       |                   | hypothetical protein                                             | Not available                  | Not available                       |            |            |
| <b>Predicted site</b> | <b>PromScan score</b> | <b>Start</b> | <b>End</b> | <b>Strand</b> | <b>Sequence</b>   |                                                                  |                                |                                     |            |            |
| Promoter 76           | 81                    | 773999       | 774015     | +             | TTGGCACGGGACATGAA |                                                                  |                                |                                     |            |            |
| <b>Operon/gene</b>    | <b>Strand</b>         | <b>Start</b> | <b>End</b> | <b>GSU</b>    | <b>Gene</b>       | <b>Annotation</b>                                                | <b>Functional category</b>     | <b>Functional subcategory</b>       | <b>COG</b> |            |
| 313 Op 1              | +                     | 774053       | 774286     | GSU0725       |                   | hypothetical protein                                             | Not available                  | Not available                       |            |            |
| 313 Op 2              | +                     | 774344       | 774949     | GSU0726       |                   | chemotaxis protein CheD, putative                                | Cellular processes             | Chemotaxis and motility             |            | ## COG1871 |
| <b>Predicted site</b> | <b>PromScan score</b> | <b>Start</b> | <b>End</b> | <b>Strand</b> | <b>Sequence</b>   |                                                                  |                                |                                     |            |            |
| Promoter 77           | 81                    | 744982       | 744998     | +             | TTGGTATTCAATTTGCT |                                                                  |                                |                                     |            |            |
| <b>Operon/gene</b>    | <b>Strand</b>         | <b>Start</b> | <b>End</b> | <b>GSU</b>    | <b>Gene</b>       | <b>Annotation</b>                                                | <b>Functional category</b>     | <b>Functional subcategory</b>       | <b>COG</b> |            |
| 306 Op 1              | +                     | 745248       | 750929     | GSU0702       |                   | cytochrome c family protein                                      | Energy metabolism              | Electron transport                  |            |            |
| 306 Op 2              | +                     | 751019       | 751543     | GSU0703       |                   | hypothetical protein                                             | Not available                  | Not available                       |            |            |
| 306 Op 3              | +                     | 751546       | 752874     | GSU0704       |                   | hypothetical protein                                             | Not available                  | Not available                       |            |            |
| 306 Op 4              | +                     | 752897       | 753697     | GSU0705       |                   | cytochrome c biogenesis protein, CcmF/CcyK/CcsA family           | Energy metabolism              | Electron transport                  |            | ## COG0755 |
| <b>Predicted site</b> | <b>PromScan score</b> | <b>Start</b> | <b>End</b> | <b>Strand</b> | <b>Sequence</b>   |                                                                  |                                |                                     |            |            |
| Promoter 78           | 81                    | 628383       | 628399     | -             | CTGGCATACGGGGTGCA |                                                                  |                                |                                     |            |            |
| <b>Operon/gene</b>    | <b>Strand</b>         | <b>Start</b> | <b>End</b> | <b>GSU</b>    | <b>Gene</b>       | <b>Annotation</b>                                                | <b>Functional category</b>     | <b>Functional subcategory</b>       | <b>COG</b> |            |
| 262 Op 1              | -                     | 625543       | 626199     | GSU0593       |                   | hypothetical protein                                             | #N/A                           | #N/A                                |            |            |
| 262 Op 2              | -                     | 626203       | 627252     | GSU0594       |                   | cytochrome c family protein                                      | Energy metabolism              | Electron transport                  |            |            |
| 262 Op 3              | -                     | 627343       | 627576     | GSU0595.1     |                   | hypothetical protein                                             | Not available                  | Not available                       |            |            |
| 262 Op 4              | -                     | 627650       | 628042     | GSU0596       |                   | response regulator                                               | Signal transduction            | Two-component systems               |            |            |
| 262 Op 5              | -                     | 628093       | 628335     | GSU0597       |                   | hypothetical protein                                             | Not available                  | Not available                       |            |            |
| <b>Predicted site</b> | <b>PromScan score</b> | <b>Start</b> | <b>End</b> | <b>Strand</b> | <b>Sequence</b>   |                                                                  |                                |                                     |            |            |
| Promoter 79           | 81                    | 555596       | 555612     | -             | TTGACAGCTTTGTGCT  |                                                                  |                                |                                     |            |            |
| <b>Operon/gene</b>    | <b>Strand</b>         | <b>Start</b> | <b>End</b> | <b>GSU</b>    | <b>Gene</b>       | <b>Annotation</b>                                                | <b>Functional category</b>     | <b>Functional subcategory</b>       | <b>COG</b> |            |
| 226 Op 1              | -                     | 549749       | 550540     | GSU0516       |                   | hypothetical protein                                             | Hypothetical proteins          | Conserved                           |            | ## COG1082 |
| 226 Op 2              | -                     | 550546       | 551760     | GSU0517       |                   | hypothetical protein                                             | #N/A                           | #N/A                                |            |            |
| 226 Op 3              | -                     | 551782       | 553305     | GSU0518       |                   | sodium/solute symporter family protein                           | Transport and binding proteins | Unknown substrate                   |            | ## COG0591 |
| 226 Op 4              | -                     | 553298       | 553624     | GSU0519       |                   | hypothetical protein                                             | Hypothetical proteins          | Conserved                           |            |            |
| 226 Op 5              | -                     | 553701       | 554927     | GSU0520       |                   | hypothetical protein                                             | Hypothetical proteins          | Conserved                           |            | ## COG0585 |
| 226 Op 6              | -                     | 554931       | 555560     | GSU0521       |                   | methyltransferase, putative                                      | Unknown function               | Enzymes of unknown specificity      |            | ## COG0220 |

|                       |                       |              |            |               |                   |                                                     |                                       |                                                        |            |  |  |
|-----------------------|-----------------------|--------------|------------|---------------|-------------------|-----------------------------------------------------|---------------------------------------|--------------------------------------------------------|------------|--|--|
| <b>Predicted site</b> | <b>PromScan score</b> | <b>Start</b> | <b>End</b> | <b>Strand</b> | <b>Sequence</b>   |                                                     |                                       |                                                        |            |  |  |
| Promoter 80           | 81                    | 465979       | 465995     | -             | CGGGCACCGCGGTTGCC |                                                     |                                       |                                                        |            |  |  |
| <b>Operon/gene</b>    | <b>Strand</b>         | <b>Start</b> | <b>End</b> | <b>GSU</b>    | <b>Gene</b>       | <b>Annotation</b>                                   | <b>Functional category</b>            | <b>Functional subcategory</b>                          | <b>COG</b> |  |  |
| 192 Tu 1              | -                     | 464944       | 465948     | GSU0434       |                   | hypothetical protein                                | Hypothetical proteins                 | Conserved                                              | ## COG0482 |  |  |
| <b>Predicted site</b> | <b>PromScan score</b> | <b>Start</b> | <b>End</b> | <b>Strand</b> | <b>Sequence</b>   |                                                     |                                       |                                                        |            |  |  |
| Promoter 81           | 81                    | 3546239      | 3546255    | -             | ACGGCAGGTAATTGCT  |                                                     |                                       |                                                        |            |  |  |
| <b>Operon/gene</b>    | <b>Strand</b>         | <b>Start</b> | <b>End</b> | <b>GSU</b>    | <b>Gene</b>       | <b>Annotation</b>                                   | <b>Functional category</b>            | <b>Functional subcategory</b>                          | <b>COG</b> |  |  |
| 1412 Op 1             | -                     | 3543991      | 3544680    | GSU3229       |                   | DNA-binding response regulator, LuxR family         | Signal transduction                   | Two-component systems                                  | ## COG2197 |  |  |
| 1412 Op 2             | -                     | 3544670      | 3546151    | GSU3230       |                   | sensory box histidine kinase                        | Signal transduction                   | Two-component systems                                  | ## COG0642 |  |  |
| <b>Predicted site</b> | <b>PromScan score</b> | <b>Start</b> | <b>End</b> | <b>Strand</b> | <b>Sequence</b>   |                                                     |                                       |                                                        |            |  |  |
| Promoter 82           | 81                    | 3503117      | 3503133    | +             | ACGGAACTTCTTGCT   |                                                     |                                       |                                                        |            |  |  |
| <b>Operon/gene</b>    | <b>Strand</b>         | <b>Start</b> | <b>End</b> | <b>GSU</b>    | <b>Gene</b>       | <b>Annotation</b>                                   | <b>Functional category</b>            | <b>Functional subcategory</b>                          | <b>COG</b> |  |  |
| 1400 Op 1             | +                     | 3503177      | 3504052    | GSU3195       |                   | chemotaxis protein methyltransferase CheR, putative | Cellular processes                    | Chemotaxis and motility                                | ## COG1352 |  |  |
| 1400 Op 2             | +                     | 3504112      | 3505398    | GSU3196       |                   | methyl-accepting chemotaxis protein                 | Cellular processes                    | Chemotaxis and motility                                | ## COG0840 |  |  |
| 1400 Op 3             | +                     | 3505407      | 3505811    | GSU3197       |                   | purine-binding chemotaxis protein CheW, putative    | Cellular processes                    | Chemotaxis and motility                                |            |  |  |
| 1400 Op 4             | +                     | 3505849      | 3506193    | GSU3198       | cheY-7            | chemotaxis protein CheY                             | Cellular processes                    | Chemotaxis and motility                                | ## COG0784 |  |  |
| 1400 Op 5             | +                     | 3506196      | 3507881    | GSU3199       |                   | chemotaxis protein CheA                             | Cellular processes                    | Chemotaxis and motility                                | ## COG0643 |  |  |
| 1400 Op 6             | +                     | 3507878      | 3508492    | GSU3200       |                   | chemotaxis protein, CheC family                     | Cellular processes                    | Chemotaxis and motility                                | ## COG1776 |  |  |
| 1400 Op 7             | +                     | 3508489      | 3508977    | GSU3201       |                   | chemotaxis protein CheD, putative                   | Cellular processes                    | Chemotaxis and motility                                | ## COG1871 |  |  |
| 1400 Op 8             | +                     | 3509017      | 3509829    | GSU3202       |                   | hypothetical protein                                | Not available                         | Not available                                          |            |  |  |
| <b>Predicted site</b> | <b>PromScan score</b> | <b>Start</b> | <b>End</b> | <b>Strand</b> | <b>Sequence</b>   |                                                     |                                       |                                                        |            |  |  |
| Promoter 83           | 81                    | 3179817      | 3179833    | -             | CTGGTATATCTTTGCT  |                                                     |                                       |                                                        |            |  |  |
| <b>Operon/gene</b>    | <b>Strand</b>         | <b>Start</b> | <b>End</b> | <b>GSU</b>    | <b>Gene</b>       | <b>Annotation</b>                                   | <b>Functional category</b>            | <b>Functional subcategory</b>                          | <b>COG</b> |  |  |
| 1298 Op 1             | -                     | 3178124      | 3178315    | GSU2892       |                   | hypothetical protein                                | Not available                         | Not available                                          |            |  |  |
| 1298 Op 2             | -                     | 3178281      | 3179501    | GSU2893       |                   | hypothetical protein                                | Not available                         | Not available                                          |            |  |  |
| <b>Predicted site</b> | <b>PromScan score</b> | <b>Start</b> | <b>End</b> | <b>Strand</b> | <b>Sequence</b>   |                                                     |                                       |                                                        |            |  |  |
| Promoter 84           | 81                    | 3105888      | 3105904    | -             | TTGGAACACTTTATGCT |                                                     |                                       |                                                        |            |  |  |
| <b>Operon/gene</b>    | <b>Strand</b>         | <b>Start</b> | <b>End</b> | <b>GSU</b>    | <b>Gene</b>       | <b>Annotation</b>                                   | <b>Functional category</b>            | <b>Functional subcategory</b>                          | <b>COG</b> |  |  |
| 1275 Tu 1             | -                     | 3105261      | 3105785    | GSU2822       |                   | response regulator                                  | Signal transduction                   | Two-component systems                                  | ## COG3707 |  |  |
| <b>Predicted site</b> | <b>PromScan score</b> | <b>Start</b> | <b>End</b> | <b>Strand</b> | <b>Sequence</b>   |                                                     |                                       |                                                        |            |  |  |
| Promoter 85           | 81                    | 3079447      | 3079463    | -             | GTGGCAGCTTAGTGT   |                                                     |                                       |                                                        |            |  |  |
| <b>Operon/gene</b>    | <b>Strand</b>         | <b>Start</b> | <b>End</b> | <b>GSU</b>    | <b>Gene</b>       | <b>Annotation</b>                                   | <b>Functional category</b>            | <b>Functional subcategory</b>                          | <b>COG</b> |  |  |
| 1261 Op 1             | -                     | 3077578      | 3078381    | GSU2798       |                   | acetyltransferase, GNAT family                      | Unknown function                      | Enzymes of unknown specificity                         | ## COG0454 |  |  |
| 1261 Op 2             | -                     | 3078386      | 3079258    | GSU2799       |                   | radical SAM domain protein                          | Unknown function                      | Enzymes of unknown specificity                         | ## COG0535 |  |  |
| <b>Predicted site</b> | <b>PromScan score</b> | <b>Start</b> | <b>End</b> | <b>Strand</b> | <b>Sequence</b>   |                                                     |                                       |                                                        |            |  |  |
| Promoter 86           | 81                    | 2842541      | 2842557    | -             | TTGGCATCCTGCCTGCT |                                                     |                                       |                                                        |            |  |  |
| <b>Operon/gene</b>    | <b>Strand</b>         | <b>Start</b> | <b>End</b> | <b>GSU</b>    | <b>Gene</b>       | <b>Annotation</b>                                   | <b>Functional category</b>            | <b>Functional subcategory</b>                          | <b>COG</b> |  |  |
| 1149 Op 1             | -                     | 2834710      | 2835063    | GSU2573       | cysE              | serine acetyltransferase                            | Amino acid biosynthesis               | Serine family                                          |            |  |  |
| 1149 Op 2             | -                     | 2835091      | 2836197    | GSU2574       |                   | response regulator                                  | Signal transduction                   | Two-component systems                                  | ## COG3437 |  |  |
| 1149 Op 3             | -                     | 2836201      | 2838753    | GSU2575       |                   | sensor histidine kinase/response regulator          | Signal transduction                   | Two-component systems                                  | ## COG0642 |  |  |
| 1149 Op 4             | -                     | 2838754      | 2839617    | GSU2576       |                   | HD domain protein                                   | Unknown function                      | General                                                | ## COG1639 |  |  |
| 1149 Op 5             | -                     | 2839604      | 2839939    | GSU2577       |                   | hypothetical protein                                | Not available                         | Not available                                          |            |  |  |
| 1149 Op 6             | -                     | 2840026      | 2840532    | GSU2578       | cheW-9            | purine-binding chemotaxis protein CheW              | Cellular processes                    | Chemotaxis and motility                                | ## COG0835 |  |  |
| 1149 Op 7             | -                     | 2840564      | 2842195    | GSU2579       |                   | methyl-accepting chemotaxis protein                 | Cellular processes                    | Chemotaxis and motility                                | ## COG0840 |  |  |
| 1149 Op 8             | -                     | 2842215      | 2842481    | GSU2580       |                   | hypothetical protein                                | Not available                         | Not available                                          |            |  |  |
| <b>Predicted site</b> | <b>PromScan score</b> | <b>Start</b> | <b>End</b> | <b>Strand</b> | <b>Sequence</b>   |                                                     |                                       |                                                        |            |  |  |
| Promoter 87           | 81                    | 2784628      | 2784644    | -             | TTGGCATGTAAATTGTA |                                                     |                                       |                                                        |            |  |  |
| <b>Operon/gene</b>    | <b>Strand</b>         | <b>Start</b> | <b>End</b> | <b>GSU</b>    | <b>Gene</b>       | <b>Annotation</b>                                   | <b>Functional category</b>            | <b>Functional subcategory</b>                          | <b>COG</b> |  |  |
| 1130 Op 1             | -                     | 2783251      | 2783754    | GSU2525       |                   | nitroreductase family protein                       | Unknown function                      | Enzymes of unknown specificity                         | ## COG0778 |  |  |
| 1130 Op 2             | -                     | 2783754      | 2784488    | GSU2526       |                   | membrane protein, putative                          | Cell envelope                         | Other                                                  |            |  |  |
| <b>Predicted site</b> | <b>PromScan score</b> | <b>Start</b> | <b>End</b> | <b>Strand</b> | <b>Sequence</b>   |                                                     |                                       |                                                        |            |  |  |
| Promoter 88           | 81                    | 2597007      | 2597023    | -             | CTGGCACATATCTTAGC |                                                     |                                       |                                                        |            |  |  |
| <b>Operon/gene</b>    | <b>Strand</b>         | <b>Start</b> | <b>End</b> | <b>GSU</b>    | <b>Gene</b>       | <b>Annotation</b>                                   | <b>Functional category</b>            | <b>Functional subcategory</b>                          | <b>COG</b> |  |  |
| 1053 Op 1             | -                     | 2591302      | 2591688    | GSU2364       |                   | mannose-6-phosphate isomerase                       | Energy metabolism                     | Sugars                                                 | ## COG0662 |  |  |
| 1053 Op 2             | -                     | 2591704      | 2592546    | GSU2365       | rfbD              | dTDP-4-dehydrohamnose reductase                     | Cell envelope                         | Biosynthesis and degradation of surface polysaccharide | ## COG1091 |  |  |
| 1053 Op 3             | -                     | 2592543      | 2593619    | GSU2366       | rfbB              | dTDP-glucose 4,6-dehydratase                        | Cell envelope                         | Biosynthesis and degradation of surface polysaccharide | ## COG1088 |  |  |
| 1053 Op 4             | -                     | 2593636      | 2595708    | GSU2367       |                   | organic solvent tolerance protein, putative         | Cellular processes                    | Detoxification                                         | ## COG1452 |  |  |
| 1053 Op 5             | -                     | 2595766      | 2596911    | GSU2368       | folC              | folC bifunctional protein                           | Biosynthesis of cofactors, prosthetic | Folic acid                                             | ## COG0285 |  |  |
| <b>Predicted site</b> | <b>PromScan score</b> | <b>Start</b> | <b>End</b> | <b>Strand</b> | <b>Sequence</b>   |                                                     |                                       |                                                        |            |  |  |
| Promoter 89           | 81                    | 1651206      | 1651222    | +             | CTGGCATCGTCACTGCA |                                                     |                                       |                                                        |            |  |  |
| <b>Operon/gene</b>    | <b>Strand</b>         | <b>Start</b> | <b>End</b> | <b>GSU</b>    | <b>Gene</b>       | <b>Annotation</b>                                   | <b>Functional category</b>            | <b>Functional subcategory</b>                          | <b>COG</b> |  |  |
| 691 Tu 1              | +                     | 1651532      | 1652161    | GSU1506       |                   | hypothetical protein                                | Not available                         | Not available                                          |            |  |  |
| <b>Predicted site</b> | <b>PromScan score</b> | <b>Start</b> | <b>End</b> | <b>Strand</b> | <b>Sequence</b>   |                                                     |                                       |                                                        |            |  |  |
| Promoter 90           | 81                    | 1523169      | 1523185    | -             | GTGGCAAAGCGCTGCA  |                                                     |                                       |                                                        |            |  |  |
| <b>Operon/gene</b>    | <b>Strand</b>         | <b>Start</b> | <b>End</b> | <b>GSU</b>    | <b>Gene</b>       | <b>Annotation</b>                                   | <b>Functional category</b>            | <b>Functional subcategory</b>                          | <b>COG</b> |  |  |
| 847 Tu 1              | -                     | 1522574      | 1523083    |               |                   |                                                     |                                       |                                                        |            |  |  |



|                       |                       |              |            |               |                   |                                                                       |                                |                               |            |
|-----------------------|-----------------------|--------------|------------|---------------|-------------------|-----------------------------------------------------------------------|--------------------------------|-------------------------------|------------|
| <b>Predicted site</b> | <b>PromScan score</b> | <b>Start</b> | <b>End</b> | <b>Strand</b> | <b>Sequence</b>   |                                                                       |                                |                               |            |
| Promoter 91           | 81                    | 1353732      | 1353748    | +             | CTGGCATTGTTTTTGAT |                                                                       |                                |                               |            |
| <b>Operon/gene</b>    | <b>Strand</b>         | <b>Start</b> | <b>End</b> | <b>GSU</b>    | <b>Gene</b>       | <b>Annotation</b>                                                     | <b>Functional category</b>     | <b>Functional subcategory</b> | <b>COG</b> |
| 583 Op 1              | +                     | 1353842      | 1360090    | GSU1251       |                   | BNR repeat domain protein                                             | Unknown function               | General                       |            |
| 583 Op 2              | +                     | 1360117      | 1365075    | GSU1252       |                   | hypothetical protein                                                  | #N/A                           | #N/A                          |            |
| 583 Op 3              | +                     | 1365114      | 1367153    | GSU1253       |                   | hypothetical protein                                                  | Not available                  | Not available                 |            |
| 583 Op 4              | +                     | 1367157      | 1368500    | GSU1254       |                   | hypothetical protein                                                  | Not available                  | Not available                 |            |
| 583 Op 5              | +                     | 1368521      | 1369105    | GSU1255       |                   | hypothetical protein                                                  | Hypothetical proteins          | Conserved                     | ## COG1999 |
| 583 Op 6              | +                     | 1369123      | 1369746    | GSU1256       |                   | hypothetical protein                                                  | Hypothetical proteins          | Domain                        |            |
| 583 Op 7              | +                     | 1369743      | 1371368    | GSU1257       |                   | ABC transporter, periplasmic-substrate binding protein, putative      | Transport and binding proteins | Unknown substrate             |            |
| <b>Predicted site</b> | <b>PromScan score</b> | <b>Start</b> | <b>End</b> | <b>Strand</b> | <b>Sequence</b>   |                                                                       |                                |                               |            |
| Promoter 92           | 81                    | 1329103      | 1329119    | +             | TTGGCTTCAGTATTGCA |                                                                       |                                |                               |            |
| <b>Operon/gene</b>    | <b>Strand</b>         | <b>Start</b> | <b>End</b> | <b>GSU</b>    | <b>Gene</b>       | <b>Annotation</b>                                                     | <b>Functional category</b>     | <b>Functional subcategory</b> | <b>COG</b> |
| 872 Tu 1              | +                     | 1329237      | 1329683    | GSU1225       |                   | hypothetical protein                                                  | Not available                  | Not available                 |            |
| <b>Predicted site</b> | <b>PromScan score</b> | <b>Start</b> | <b>End</b> | <b>Strand</b> | <b>Sequence</b>   |                                                                       |                                |                               |            |
| Promoter 93           | 81                    | 1121057      | 1121073    | -             | GCGGCACGAGATCTGCA |                                                                       |                                |                               |            |
| <b>Operon/gene</b>    | <b>Strand</b>         | <b>Start</b> | <b>End</b> | <b>GSU</b>    | <b>Gene</b>       | <b>Annotation</b>                                                     | <b>Functional category</b>     | <b>Functional subcategory</b> | <b>COG</b> |
| 480 Tu 1              | -                     | 1119359      | 1121023    | GSU1036       |                   | sensor histidine kinase                                               | Signal transduction            | Two-component systems         | ## COG0642 |
| <b>Predicted site</b> | <b>PromScan score</b> | <b>Start</b> | <b>End</b> | <b>Strand</b> | <b>Sequence</b>   |                                                                       |                                |                               |            |
| Promoter 94           | 80                    | 87167        | 87183      | -             | ATGGCACGTTTTATGAA |                                                                       |                                |                               |            |
| <b>Operon/gene</b>    | <b>Strand</b>         | <b>Start</b> | <b>End</b> | <b>GSU</b>    | <b>Gene</b>       | <b>Annotation</b>                                                     | <b>Functional category</b>     | <b>Functional subcategory</b> | <b>COG</b> |
| 35 Tu 1               | -                     | 86581        | 87030      | GSU0071       |                   | hypothetical protein                                                  | Not available                  | Not available                 |            |
| <b>Predicted site</b> | <b>PromScan score</b> | <b>Start</b> | <b>End</b> | <b>Strand</b> | <b>Sequence</b>   |                                                                       |                                |                               |            |
| Promoter 95           | 80                    | 854282       | 854298     | -             | ATGCCTCGCCGCTTGCA |                                                                       |                                |                               |            |
| <b>Operon/gene</b>    | <b>Strand</b>         | <b>Start</b> | <b>End</b> | <b>GSU</b>    | <b>Gene</b>       | <b>Annotation</b>                                                     | <b>Functional category</b>     | <b>Functional subcategory</b> | <b>COG</b> |
| 357 Op 1              | -                     | 852149       | 853831     | GSU0794       |                   | pyridine nucleotide-disulfide oxidoreductase/rhodanese domain protein | Unknown function               | General                       | ## COG0446 |
| 357 Op 2              | -                     | 853894       | 854202     | GSU0795       |                   | rhodanese-like domain protein                                         | Unknown function               | General                       | ## COG0607 |
| <b>Predicted site</b> | <b>PromScan score</b> | <b>Start</b> | <b>End</b> | <b>Strand</b> | <b>Sequence</b>   |                                                                       |                                |                               |            |
| Promoter 96           | 80                    | 849091       | 849107     | -             | CTGGCATTATTTTTGTT |                                                                       |                                |                               |            |
| <b>Operon/gene</b>    | <b>Strand</b>         | <b>Start</b> | <b>End</b> | <b>GSU</b>    | <b>Gene</b>       | <b>Annotation</b>                                                     | <b>Functional category</b>     | <b>Functional subcategory</b> | <b>COG</b> |
| 354 Op 1              | -                     | 848545       | 848949     | GSU0789       |                   | response regulator                                                    | Signal transduction            | Two-component systems         | ## COG2204 |
| 354 Op 2              | -                     | 849136       | 850056     | GSU0790       |                   | hypothetical protein                                                  | Not available                  | Not available                 |            |
| <b>Predicted site</b> | <b>PromScan score</b> | <b>Start</b> | <b>End</b> | <b>Strand</b> | <b>Sequence</b>   |                                                                       |                                |                               |            |
| Promoter 97           | 80                    | 716820       | 716836     | +             | TTGGCACGAATTTTTTT |                                                                       |                                |                               |            |
| <b>Operon/gene</b>    | <b>Strand</b>         | <b>Start</b> | <b>End</b> | <b>GSU</b>    | <b>Gene</b>       | <b>Annotation</b>                                                     | <b>Functional category</b>     | <b>Functional subcategory</b> | <b>COG</b> |
| 294 Op 1              | +                     | 716939       | 718009     | GSU0681       |                   | sensory box histidine kinase                                          | Signal transduction            | Two-component systems         | ## COG0642 |
| 294 Op 2              | +                     | 718009       | 718656     | GSU0682       |                   | DNA-binding response regulator, LuxR family                           | Signal transduction            | Two-component systems         | ## COG2197 |
| <b>Predicted site</b> | <b>PromScan score</b> | <b>Start</b> | <b>End</b> | <b>Strand</b> | <b>Sequence</b>   |                                                                       |                                |                               |            |
| Promoter 98           | 80                    | 3462928      | 3462944    | +             | ACGGCACCGGCATTGCC |                                                                       |                                |                               |            |
| <b>Operon/gene</b>    | <b>Strand</b>         | <b>Start</b> | <b>End</b> | <b>GSU</b>    | <b>Gene</b>       | <b>Annotation</b>                                                     | <b>Functional category</b>     | <b>Functional subcategory</b> | <b>COG</b> |
| 1383 Tu 1             | +                     | 3463053      | 3464168    | GSU3156       |                   | methyl-accepting chemotaxis protein, putative                         | Cellular processes             | Chemotaxis and motility       | ## COG0840 |
| <b>Predicted site</b> | <b>PromScan score</b> | <b>Start</b> | <b>End</b> | <b>Strand</b> | <b>Sequence</b>   |                                                                       |                                |                               |            |
| Promoter 99           | 80                    | 2699909      | 2699925    | +             | ACGGGACGGGGATTGCA |                                                                       |                                |                               |            |
| <b>Operon/gene</b>    | <b>Strand</b>         | <b>Start</b> | <b>End</b> | <b>GSU</b>    | <b>Gene</b>       | <b>Annotation</b>                                                     | <b>Functional category</b>     | <b>Functional subcategory</b> | <b>COG</b> |
| 1096 Tu 1             | +                     | 2700316      | 2701422    | GSU2462       |                   | homoserine O-acetyltransferase                                        | Amino acid biosynthesis        | Aspartate family              | ## COG2021 |
| <b>Predicted site</b> | <b>PromScan score</b> | <b>Start</b> | <b>End</b> | <b>Strand</b> | <b>Sequence</b>   |                                                                       |                                |                               |            |
| Promoter 100          | 80                    | 2247542      | 2247558    | -             | AAGGCCTGAATCTTGCT |                                                                       |                                |                               |            |
| <b>Operon/gene</b>    | <b>Strand</b>         | <b>Start</b> | <b>End</b> | <b>GSU</b>    | <b>Gene</b>       | <b>Annotation</b>                                                     | <b>Functional category</b>     | <b>Functional subcategory</b> | <b>COG</b> |
| 926 Tu 1              | -                     | 2246279      | 2247466    | GSU2047       |                   | hypothetical protein                                                  | Hypothetical proteins          | Conserved                     | ## COG1680 |
| <b>Predicted site</b> | <b>PromScan score</b> | <b>Start</b> | <b>End</b> | <b>Strand</b> | <b>Sequence</b>   |                                                                       |                                |                               |            |
| Promoter 101          | 80                    | 2186329      | 2186345    | +             | TGGGCACAACAAATGCT |                                                                       |                                |                               |            |
| <b>Operon/gene</b>    | <b>Strand</b>         | <b>Start</b> | <b>End</b> | <b>GSU</b>    | <b>Gene</b>       | <b>Annotation</b>                                                     | <b>Functional category</b>     | <b>Functional subcategory</b> | <b>COG</b> |
| 908 Tu 1              | +                     | 2186413      | 2187024    | GSU1994       |                   | hypothetical protein                                                  | Not available                  | Not available                 |            |
| <b>Predicted site</b> | <b>PromScan score</b> | <b>Start</b> | <b>End</b> | <b>Strand</b> | <b>Sequence</b>   |                                                                       |                                |                               |            |
| Promoter 102          | 80                    | 2135268      | 2135284    | -             | ATGGCAAATATTTAGCT |                                                                       |                                |                               |            |
| <b>Operon/gene</b>    | <b>Strand</b>         | <b>Start</b> | <b>End</b> | <b>GSU</b>    | <b>Gene</b>       | <b>Annotation</b>                                                     | <b>Functional category</b>     | <b>Functional subcategory</b> | <b>COG</b> |
| 896 Op 1              | -                     | 2133874      | 2134860    |               |                   |                                                                       |                                |                               |            |
| 896 Op 2              | -                     | 2134875      | 2135165    | GSU1948       |                   | hypothetical protein                                                  | Not available                  | Not available                 |            |
| <b>Predicted site</b> | <b>PromScan score</b> | <b>Start</b> | <b>End</b> | <b>Strand</b> | <b>Sequence</b>   |                                                                       |                                |                               |            |
| Promoter 103          | 80                    | 2002713      | 2002729    | -             | TAGGCAGACTATTTGCT |                                                                       |                                |                               |            |
| <b>Operon/gene</b>    | <b>Strand</b>         | <b>Start</b> | <b>End</b> | <b>GSU</b>    | <b>Gene</b>       | <b>Annotation</b>                                                     | <b>Functional category</b>     | <b>Functional subcategory</b> | <b>COG</b> |
| 843 Op 1              | -                     | 2000819      | 2002231    | GSU1835       |                   | glutamine synthetase, type I                                          | Amino acid biosynthesis        | Glutamate family              | ## COG0174 |
| 843 Op 2              | -                     | 2002270      | 2002608    | GSU1836       |                   | nitrogen regulatory protein P-II                                      | Regulatory functions           | Protein interactions          | ## COG0347 |

|                       |                       |              |            |               |                    |                                        |                            |                               |            |
|-----------------------|-----------------------|--------------|------------|---------------|--------------------|----------------------------------------|----------------------------|-------------------------------|------------|
| <b>Predicted site</b> | <b>PromScan score</b> | <b>Start</b> | <b>End</b> | <b>Strand</b> | <b>Sequence</b>    |                                        |                            |                               |            |
| Promoter 104          | 80                    | 191151       | 191167     | +             | GTGGCACCGGTTGGCG   |                                        |                            |                               |            |
| <b>Operon/gene</b>    | <b>Strand</b>         | <b>Start</b> | <b>End</b> | <b>GSU</b>    | <b>Gene</b>        | <b>Annotation</b>                      | <b>Functional category</b> | <b>Functional subcategory</b> | <b>COG</b> |
| 81 Tu 1               | +                     | 191349       | 191960     | GSU0175       |                    | transcriptional regulator, TetR family | Regulatory functions       | DNA interactions              | ## COG1309 |
| <b>Predicted site</b> | <b>PromScan score</b> | <b>Start</b> | <b>End</b> | <b>Strand</b> | <b>Sequence</b>    |                                        |                            |                               |            |
| Promoter 105          | 80                    | 1874885      | 1874901    | +             | AGGGCAAAGCTACTTGCG |                                        |                            |                               |            |
| <b>Operon/gene</b>    | <b>Strand</b>         | <b>Start</b> | <b>End</b> | <b>GSU</b>    | <b>Gene</b>        | <b>Annotation</b>                      | <b>Functional category</b> | <b>Functional subcategory</b> | <b>COG</b> |
| 792 Tu 1              | +                     | 1874995      | 1876245    | GSU1709.1     | smpB               | SsrA-binding protein                   | Protein synthesis          | Other                         | ## COG0582 |

|                       |                       |              |            |               |                    |                                                             |                                   |                                            |            |
|-----------------------|-----------------------|--------------|------------|---------------|--------------------|-------------------------------------------------------------|-----------------------------------|--------------------------------------------|------------|
| <b>Predicted site</b> | <b>PromScan score</b> | <b>Start</b> | <b>End</b> | <b>Strand</b> | <b>Sequence</b>    |                                                             |                                   |                                            |            |
| Promoter 106          | 80                    | 1843205      | 1843221    | +             | AAGGCACTGTTCCCTGCA |                                                             |                                   |                                            |            |
| <b>Operon/gene</b>    | <b>Strand</b>         | <b>Start</b> | <b>End</b> | <b>GSU</b>    | <b>Gene</b>        | <b>Annotation</b>                                           | <b>Functional category</b>        | <b>Functional subcategory</b>              | <b>COG</b> |
| 782 Op 1              | +                     | 1843279      | 1843620    | GSU1682       |                    | lipoprotein, putative                                       | Cell envelope                     | Other                                      |            |
| 782 Op 2              | +                     | 1843617      | 1844066    | GSU1683       |                    | hypothetical protein                                        | Hypothetical proteins             | Conserved                                  |            |
| <b>Predicted site</b> | <b>PromScan score</b> | <b>Start</b> | <b>End</b> | <b>Strand</b> | <b>Sequence</b>    |                                                             |                                   |                                            |            |
| Promoter 107          | 80                    | 181724       | 181740     | +             | TTGGAATTCGAGTTGCT  |                                                             |                                   |                                            |            |
| <b>Operon/gene</b>    | <b>Strand</b>         | <b>Start</b> | <b>End</b> | <b>GSU</b>    | <b>Gene</b>        | <b>Annotation</b>                                           | <b>Functional category</b>        | <b>Functional subcategory</b>              | <b>COG</b> |
| 74 Tu 1               | +                     | 182339       | 182458     |               |                    |                                                             |                                   |                                            |            |
| <b>Predicted site</b> | <b>PromScan score</b> | <b>Start</b> | <b>End</b> | <b>Strand</b> | <b>Sequence</b>    |                                                             |                                   |                                            |            |
| Promoter 108          | 80                    | 1540183      | 1540199    | +             | GTCGCCCGCACGTTGCT  |                                                             |                                   |                                            |            |
| <b>Operon/gene</b>    | <b>Strand</b>         | <b>Start</b> | <b>End</b> | <b>GSU</b>    | <b>Gene</b>        | <b>Annotation</b>                                           | <b>Functional category</b>        | <b>Functional subcategory</b>              | <b>COG</b> |
| 657 Op 1              | +                     | 1540372      | 1543839    | GSU1401       | dnaE               | DNA polymerase III, alpha subunit                           | DNA metabolism                    | DNA replication, recombination, and repair | ## COG0587 |
| 657 Op 2              | +                     | 1543877      | 1544836    | GSU1402       | accA               | acetyl-CoA carboxylase, carboxyl transferase, alpha subunit | Fatty acid and phospholipid metab | Biosynthesis                               | ## COG0825 |
| <b>Predicted site</b> | <b>PromScan score</b> | <b>Start</b> | <b>End</b> | <b>Strand</b> | <b>Sequence</b>    |                                                             |                                   |                                            |            |
| Promoter 109          | 80                    | 1380900      | 1380916    | -             | TCGGCACGCAATTTGTA  |                                                             |                                   |                                            |            |
| <b>Operon/gene</b>    | <b>Strand</b>         | <b>Start</b> | <b>End</b> | <b>GSU</b>    | <b>Gene</b>        | <b>Annotation</b>                                           | <b>Functional category</b>        | <b>Functional subcategory</b>              | <b>COG</b> |
| 587 Tu 1              | -                     | 1379856      | 1380863    | GSU1268       |                    | transcriptional regulator, LysR family                      | Regulatory functions              | DNA interactions                           | ## COG0583 |
| <b>Predicted site</b> | <b>PromScan score</b> | <b>Start</b> | <b>End</b> | <b>Strand</b> | <b>Sequence</b>    |                                                             |                                   |                                            |            |
| Promoter 110          | 80                    | 1293612      | 1293628    | -             | ATGGCATGCAAATGGCC  |                                                             |                                   |                                            |            |
| <b>Operon/gene</b>    | <b>Strand</b>         | <b>Start</b> | <b>End</b> | <b>GSU</b>    | <b>Gene</b>        | <b>Annotation</b>                                           | <b>Functional category</b>        | <b>Functional subcategory</b>              | <b>COG</b> |
| 553 Tu 1              | -                     | 1292703      | 1293191    | GSU1185       |                    | hypothetical protein                                        | Hypothetical proteins             | Conserved                                  | ## COG1839 |
