# Supplementary material for: Genome-wide analysis of the RpoN regulon in Geobacter sulfurreducens
Source: PubMed Central journal article supplement (PMC2725144; doi:10.1186/1471-2164-10-331), 2009-07-22
Supplement: 1471-2164-10-331-S6.pdf [file 1471-2164-10-331-S6.pdf]

**a** A G C T WT<sup>V</sup> RpoN<sup>+</sup>

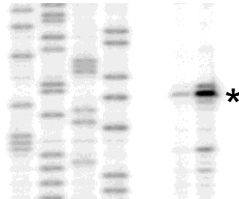

### GSU0364-PpcB

ATAGATGTCGATGGCGGACAGGGCGCTGGCCTCC

TACACTGGGACCATGCGATTTCGCACACACCCCCG  
-10

AAAGGAGAATCACCATG  
RBS Met

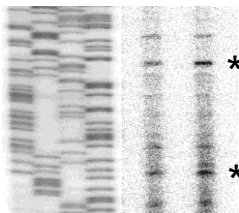

### GSU2005-ABC Transporter

AAAGCCGGTCAGAGAGCAGATTGGCCCCAGTTAT

ACCCGAACTGGGCGTTCTGGAAATGTATTTTGA

AGTGTATTATAAAGTATTGTCAGTCACTACCCAC  
CAAGGAGGCAGAACATG  
RBS Met

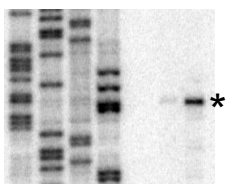

### GSU2302-Trehalose phosphatase

CCCTGTCAACCGATAGTGCCTCGGCCGTTCTTT

ATCATTAATTCGGCCGCAACAGCATTCCGGGAA  
ACCGTCCGCCGCGGTCCCGGGACAACGGAGGTG  
RBS

CAACGATG  
Met

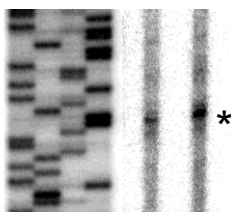

### GSU2490-oxalate/formate antiporter

GCCGTTATAACATTATGTTTTTCGTTACTTTTTTA

AAATAAACATAATTTTATAACAATGGTATGCAAG  
TTGCTCTACCTCAAACAAACGCACTTCGTTTCGTC  
CACAGAGTCTGAACTCGTTCATAAGGAGGTAGCG  
RBS

CGATG  
Met

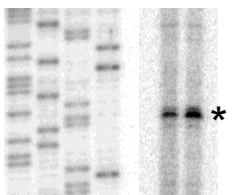

### GSU3206-DksA

TTGCTTGACTTCAAAAAAGTTTTTCGGTATCATTTT

GTGGCTCTTGAGGCCGGAAAATCAGCAGAGGGA  
RBS

GATAGTAAATG  
Met

**b** A G C T WT<sup>V</sup> RpoN<sup>+</sup>

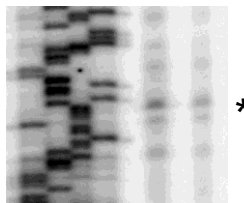

### GSU0939-Nitrogen regulatory protein

GCACAACGCTGTGCCATCCATGCAACGAAATCGG

GTAACCAGGCAAAGGCGCCTTCCACCACGGGTGG  
AGGCGCCTTTCTTTTTTACATTGTGCGGAAAGGA  
GGAGAAGCTGAACGCTGTGGGAGGACATTCGTG  
AATGCAATTATTACTGACAAAGGAGAAGCATCA  
RBS

ATG  
Met
