# Supplementary material for: Genome-wide analysis of the RpoN regulon in Geobacter sulfurreducens
Source: PubMed Central journal article supplement (PMC2725144; doi:10.1186/1471-2164-10-331), 2009-07-22
Supplement: 1471-2164-10-331-S7.pdf [file 1471-2164-10-331-S7.pdf]

## Additional file 7. Primers used in this work

| Primers       | Sequences (5'-3')                          | Usage               |
|---------------|--------------------------------------------|---------------------|
| rpoNU-1       | CGGCGAAGAGGACATCACG                        | Mutagenesis         |
| rpoNU-2       | AGAGTCTGAATGATTCTCCC                       | Mutagenesis         |
| rpoNU-3       | GGGAGAATCATTGACTCTACCTGGGATGAATGTCAGCTAC   | Mutagenesis         |
| rpoNU-4       | CCGGCTGCAGAACCGGCTGGCAGAAGGCGGCGGTGGAATCG  | Mutagenesis         |
| rpoNU-5       | GCCAGCCGGTTCTGCAGCCGG                      | Mutagenesis         |
| rpoNU-6       | GCCGTCTTCATCTATGTTGC                       | Mutagenesis         |
| rpoND-1       | CCCAATCTGAGAATCAG                          | Mutagenesis         |
| rpoND-2       | CAAATGTCAGCTGGTC                           | Mutagenesis         |
| rpoND-3       | GACCAGCTGACATTTTGACCTGGGATGAATGTCAGCTAC    | Mutagenesis         |
| rpoND-4       | CAAAGCACGAAATGACGAGAAGGCGGCGGTGGAATCG      | Mutagenesis         |
| rpoND-5       | CGTCATTTTCGTGCTTTG                         | Mutagenesis         |
| rpoND-6       | TCCTTGTGCAGAAGATCC                         | Mutagenesis         |
| Cm-rpoNF1     | GCGCCACGGAAGATCACTTCGC                     | Mutagenesis         |
| Cm-rpoNR2     | AGAGTCTGAATGATTCTCCCAGGGCACCAATAACTGCC     | Mutagenesis         |
| C-rpoNF3      | GGGAGAATCATTGACTCT                         | Mutagenesis         |
| C-rpoNR4      | GCGCCCAAAGCACGAAATGACGATC                  | Mutagenesis         |
| ppcAF1        | CGTTCGTCATGGAAGAAG                         | Mutagenesis         |
| ppcAR2        | GGAACAGAAGAAATCCCACAG                      | Mutagenesis         |
| RpoNKmII-1    | CTGGTCCGTCAGGAGATGG                        | Mutagenesis         |
| RpoNKmII-2    | GGATCAGGAGACATTCCCTC                       | Mutagenesis         |
| RpoNKmII-5    | CACCTCCACTTGGAG                            | Mutagenesis         |
| RpoNKmII-6    | TACGTCCCTGAGCACCAG                         | Mutagenesis         |
| RpoNKmII-3    | GAGGGAATGTCTCCTGATCCACCTGGGATGAATGTCAGCTAC | Mutagenesis         |
| RpoNKmII-4    | CTCCAAGTCGTGGAGGTGAGAAGGCGGCGGTGGAATCG     | Mutagenesis         |
| RpoNfor-XbaI  | GGTCTAGACGGATCTTCCTTCAAAGGTG               | RpoN expression     |
| RpoNrev-EcoRI | GGGAATTCGTCAGCTGGTCAAAAATGAC               | RpoN expression     |
| RpoNfor-EcoRI | GGGAATTCGGATCTTCCTTCAAAGGTG                | RpoN overexpression |

Additional file 7

|                  |                                 |                                             |
|------------------|---------------------------------|---------------------------------------------|
| RpoNrev-HindIII  | GGAAGCTTGTCTCAGCTGGTCAAAAATGACG | RpoN overexpression                         |
| GSU0364-06       | GCCAGGGATGCGATCAG               | Primer extension                            |
| GSU0420-04       | AAGCTTTTTCTTGTCTTTG             | Primer extension                            |
| GSU0777-04       | CTGCCTTCGTGAAATACC              | Primer extension                            |
| GSU0938-06       | GGTCAGGGAAAGAATCTTC             | Primer extension                            |
| GSU1836-04       | CTTCATCCAGCTTGAACG              | Primer extension                            |
| GSU2005-02       | CGATCTTACGTTGGCTGC              | Primer extension                            |
| GSU2302-04       | CGAAAGAGAAAATCCAGAG             | Primer extension                            |
| GSU2490-02       | GCTACTTGCCACCCCTTG              | Primer extension                            |
| GSU2751-02       | GAGAACGAGAACGAACTGG             | Primer extension                            |
| GSU2806-08       | GGTTGTGTCGTAATAATC              | Primer extension                            |
| GSU3046-02       | CGTCTGACATGAGAGTTTC             | Primer extension                            |
| GSU3206-06       | GAGCCTTCATTCCTCAG               | Primer extension                            |
| pGEXrpoNEcoRIfor | GGGAATTCGCCATTGAAATGCGCCAAC     | RpoN overexpression for antibody production |
| pGEXrpoNXholrev  | GGCTCGAGTCAAAAATGACGTTTGCG      | RpoN overexpression for antibody production |
