# Supplementary material for: Genome-wide analysis of the RpoN regulon in Geobacter sulfurreducens
Source: BMC Genomics. 2009 Jul 22;10:331. doi: 10.1186/1471-2164-10-331 (PMC2725144; doi:10.1186/1471-2164-10-331)
Supplement: Additional file 5 — List of operons/genes containing RpoN-dependent promoters identified by the PromScan analysis and also identified using transcriptome analysis. [file 1471-2164-10-331-S5.pdf]

**Additional file 5. List of operons/genes containing RpoN-dependent promoters identified by the PromScan analysis and also identified using transcriptome analysis.**

1. Promoter # are based on the PromScan scores and are the same as those reported in additional files 3 & 4.
2. The search is based on fold change cutoff at 1.25 and  $P < 0.0005$ .
3. N.D.: Not detected. The fold changes of the gene did not match the differential expression criteria.

| Promoter # | GSU     | Gene          | Annotation                                                                | Fold changes |
|------------|---------|---------------|---------------------------------------------------------------------------|--------------|
| 1          | GSU3050 |               | flagella basal body P-ring formation protein flgA, putative               | N.D.         |
|            | GSU3051 | <i>flgG-1</i> | flagellar basal-body rod protein FlgG                                     | N.D.         |
|            | GSU3052 | <i>flgG-2</i> | flagellar basal-body rod protein FlgG                                     | N.D.         |
|            | GSU3053 | <i>fliA</i>   | RNA polymerase sigma factor for flagellar Operon/gene/gene                | N.D.         |
|            | GSU3054 |               | ParA family protein                                                       | N.D.         |
|            | GSU3055 |               | flagellar biosynthetic protein FlhF, putative                             | -1.34        |
|            | GSU3056 | <i>flhA</i>   | flagellar biosynthetic protein FlhA                                       | N.D.         |
|            |         |               |                                                                           |              |
| 2          | GSU0937 | <i>nifV</i>   | homocitrate synthase                                                      | -1.47        |
|            |         |               |                                                                           |              |
| 3          | GSU0407 | <i>flgB</i>   | flagellar basal-body rod protein FlgB                                     | N.D.         |
|            | GSU0408 | <i>flgC</i>   | flagellar basal-body rod protein FlgC                                     | -1.31        |
|            |         |               |                                                                           |              |
| 5          | GSU2005 |               | branched-chain amino acid ABC transporter, periplasmic amino acid-binding | 1.38         |
|            | GSU2006 |               | branched-chain amino acid ABC transporter, permease protein               | 1.29         |
|            | GSU2007 |               | branched-chain amino acid ABC transporter, permease protein               | N.D.         |
|            | GSU2008 |               | branched-chain amino acid ABC transporter, ATP-binding protein            | N.D.         |
|            | GSU2009 |               | branched-chain amino acid ABC transporter, ATP-binding protein            | 1.23         |
|            | GSU2010 |               | CBS domain protein                                                        | N.D.         |
|            |         |               |                                                                           |              |
| 10         | GSU0938 |               | hypothetical protein                                                      | N.D.         |
|            | GSU0939 |               | nitrogen regulatory protein P-II, putative                                | -1.40        |
|            | GSU0940 |               | ammonium transporter                                                      | N.D.         |
|            |         |               |                                                                           |              |
| 11         | GSU0777 | <i>fdnG</i>   | formate dehydrogenase, major subunit, selenocysteine-containing           | -1.20        |
|            | GSU0777 | <i>fdnG</i>   | formate dehydrogenase, major subunit, selenocysteine-containing           | -1.20        |
|            | GSU0778 | <i>fdnH</i>   | formate dehydrogenase, iron-sulfur subunit                                | N.D.         |

|    |                       |                                                              |       |
|----|-----------------------|--------------------------------------------------------------|-------|
|    | GSU0779               | formate dehydrogenase, b-type cytochrome subunit, putative   | N.D.  |
|    | GSU0780               | formate dehydrogenase accessory protein FdhD                 | N.D.  |
|    | GSU0781               | twin-arginine translocation protein, TatA/E family           | -1.41 |
|    |                       |                                                              |       |
| 12 | GSU3409               | hypothetical protein                                         | N.D.  |
|    | GSU3410               | hypothetical protein                                         | 3.31  |
|    |                       |                                                              |       |
| 13 | GSU2938               | hypothetical protein                                         | -1.49 |
|    | GSU2939               | outer membrane porin FmdC, putative                          | N.D.  |
|    | GSU2940               | lipoprotein, putative                                        | N.D.  |
|    |                       |                                                              |       |
| 18 | GSU2634               | hypothetical protein                                         | N.D.  |
|    | GSU2635               | hypothetical protein                                         | N.D.  |
|    | GSU2636               | alpha-amylase family protein                                 | 1.16  |
|    | GSU2637               | alcohol dehydrogenase, zinc-containing                       | 1.31  |
|    |                       |                                                              |       |
| 19 | GSU2202               | transcriptional regulator, LysR family                       | -1.30 |
|    |                       |                                                              |       |
| 20 | GSU1235               | hypothetical protein                                         | N.D.  |
|    | GSU1236               | hypothetical protein                                         | N.D.  |
|    | GSU1237               | pyridine nucleotide-disulphide oxidoreductase family protein | -1.44 |
|    | GSU1238               | iron-sulfur cluster-binding protein                          | N.D.  |
|    | GSU1239               | glutamate synthase-related protein                           | N.D.  |
|    |                       |                                                              |       |
| 25 | GSU0420               | flagellar protein FliL                                       | -1.47 |
|    | GSU0421 <i>fliM</i>   | flagellar motor switch protein FliM                          | N.D.  |
|    | GSU0422 <i>fliN</i>   | flagellar motor switch protein FliN                          | -1.93 |
|    | GSU0422.1 <i>fliN</i> | flagellar motor switch protein FliN                          | N.D.  |
|    | GSU0423 <i>fliP</i>   | flagellar biosynthetic protein FliP                          | N.D.  |
|    | GSU0424 <i>fliQ</i>   | flagellar biosynthetic protein FliQ                          | N.D.  |
|    | GSU0425 <i>fliR</i>   | flagellar biosynthesis protein FliR                          | -1.72 |
|    | GSU0426 <i>flhB</i>   | flagellar biosynthetic protein FlhB                          | N.D.  |

|           |                      |                                                                 |       |
|-----------|----------------------|-----------------------------------------------------------------|-------|
| <b>27</b> | GSU3175              | hypothetical protein                                            | N.D.  |
|           | GSU3176              | lysM domain protein                                             | -1.25 |
|           | GSU3177              | Rhs family protein                                              | N.D.  |
|           | GSU3178              | hypothetical protein                                            | -1.31 |
|           | GSU3179              | hypothetical protein                                            | N.D.  |
|           |                      |                                                                 |       |
| <b>28</b> | GSU3040              | hypothetical protein                                            | N.D.  |
|           | GSU3041 <i>csrA</i>  | carbon storage regulator                                        | N.D.  |
|           | GSU3042 <i>flgL</i>  | flagellar hook-associated protein FlgL                          | N.D.  |
|           | GSU3043 <i>flgK</i>  | flagellar hook-associated protein FlgK                          | N.D.  |
|           | GSU3044              | hypothetical protein                                            | N.D.  |
|           | GSU3045 <i>flgM</i>  | negative regulator of flagellin synthesis FlgM                  | N.D.  |
|           | GSU3046 <i>flgJ</i>  | flagellar protein FlgJ-like protein                             | -1.41 |
|           |                      |                                                                 |       |
| <b>29</b> | GSU3017              | hypothetical protein                                            | N.D.  |
|           | GSU3018              | hypothetical protein                                            | 1.44  |
|           | GSU3019              | dehydrogenase, E1 component, alpha and beta subunits            | N.D.  |
|           | GSU3020              | hexapeptide transferase family protein                          | N.D.  |
|           | GSU3021              | DegT/DnrJ/EryC1/StrS family protein                             | N.D.  |
|           | GSU3022              | hypothetical protein                                            | N.D.  |
|           | GSU3023              | glycosyl transferase, group 38354 family protein                | N.D.  |
|           | GSU3024              | hypothetical protein                                            | 1.15  |
|           | GSU3025              | heptosyltransferase family protein                              | N.D.  |
|           | GSU3026              | flagellar protein FlbD, putative                                | N.D.  |
|           | GSU3027              | chemotaxis MotA protein                                         | N.D.  |
|           | GSU3028 <i>motB</i>  | chemotaxis MotB protein                                         | N.D.  |
|           |                      |                                                                 |       |
| <b>31</b> | GSU2802 <i>dRAT</i>  | NAD(+)-dinitrogen-reductase ADP-D-ribosyltransferase            | N.D.  |
|           | GSU2803              | dinitrogenase iron-molybdenum cofactor family protein           | N.D.  |
|           | GSU2804              | ferredoxin family protein                                       | -1.24 |
|           | GSU2805 <i>nifX</i>  | nitrogenase molybdenum-iron cofactor biosynthesis protein NifX  | N.D.  |
|           | GSU2806 <i>nifEN</i> | nitrogenase molybdenum-iron cofactor biosynthesis protein NifEN | -1.27 |

|           |                     |                                                   |       |
|-----------|---------------------|---------------------------------------------------|-------|
| <b>32</b> | GSU2622             | HAMP domain/GAF domain/HD domain protein          | -1.35 |
| <b>34</b> | GSU2476             | TPR domain protein                                | N.D.  |
|           | GSU2477             | TPR domain/radical SAM/B12 binding domain protein | -1.26 |
| <b>35</b> | GSU0098             | MglB protein                                      | N.D.  |
|           | GSU0099             | MglA protein                                      | 1.43  |
| <b>40</b> | GSU2908             | hypothetical protein                              | -1.34 |
|           | GSU2909             | lipoprotein, putative                             | N.D.  |
|           | GSU2910             | hypothetical protein                              | N.D.  |
|           | GSU2911             | hypothetical protein                              | -1.33 |
| <b>42</b> | GSU2490             | oxalate/formate antiporter, putative              | 1.36  |
| <b>44</b> | GSU2034             | hypothetical protein                              | -1.32 |
|           | GSU2035             | hypothetical protein                              | -1.33 |
|           | GSU2036             | hypothetical protein                              | -1.66 |
|           | GSU2037             | hypothetical protein                              | N.D.  |
|           | GSU2038             | hypothetical protein                              | N.D.  |
|           | GSU2039             | hypothetical protein                              | N.D.  |
| <b>47</b> | GSU0618 <i>omcE</i> | cytochrome c family protein                       | 1.26  |
| <b>48</b> | GSU0357             | cytochrome c family protein                       | 1.24  |
|           | GSU0358             | iron-sulfur cluster-binding protein               | N.D.  |
| <b>50</b> | GSU2884             | cytochrome c family protein                       | -1.34 |
|           | GSU2885             | NHL repeat domain protein                         | N.D.  |
| <b>51</b> | GSU2378 <i>trpF</i> | N-(5'phosphoribosyl)anthranilate isomerase        | -1.48 |
|           | GSU2379             | pyridoxal-phosphate dependent enzyme              | N.D.  |
|           | GSU2380 <i>trpC</i> | Indole-3-glycerol phosphate synthase              | N.D.  |

|           |         |             |                                                                  |       |
|-----------|---------|-------------|------------------------------------------------------------------|-------|
|           | GSU2381 | <i>trpD</i> | anthranilate phosphoribosyltransferase                           | N.D.  |
|           | GSU2382 | <i>trpG</i> | anthranilate synthase component II                               | N.D.  |
|           | GSU2383 | <i>trpE</i> | anthranilate synthase component I                                | N.D.  |
|           | GSU2384 |             | sensor histidine kinase                                          | N.D.  |
|           | GSU2385 |             | hypothetical protein                                             | -1.30 |
|           | GSU2386 |             | methylcobamide:CoM methyltransferase-related protein             | N.D.  |
|           | GSU2387 |             | B12-binding domain                                               | N.D.  |
|           | GSU2388 |             | sensory box histidine kinase                                     | -1.27 |
|           | GSU2389 |             | ABC transporter, periplasmic substrate-binding protein, putative | N.D.  |
| <b>58</b> | GSU0930 |             | sulfur transferase, putative, selenocysteine-containing          | -1.34 |
| <b>60</b> | GSU3364 |             | hypothetical protein                                             | 1.45  |
| <b>61</b> | GSU3206 |             | dnaK suppressor protein, putative                                | 1.56  |
| <b>63</b> | GSU2815 |             | sensory box histidine kinase                                     | 1.22  |
| <b>64</b> | GSU2750 |             | hypothetical protein                                             | 1.30  |
|           | GSU2751 | <i>dcuB</i> | C4-dicarboxylate transporter, anaerobic                          | 1.63  |
| <b>66</b> | GSU1944 |             | hypothetical protein                                             | -1.38 |
| <b>73</b> | GSU2531 |             | sensory box histidine kinase                                     | N.D.  |
|           | GSU2532 |             | hypothetical protein                                             | N.D.  |
|           | GSU2533 |             | hypothetical protein                                             | N.D.  |
|           | GSU2534 |             | sensory box/response regulator                                   | -1.26 |
|           | GSU2535 |             | response regulator                                               | -1.28 |
| <b>77</b> | GSU0702 |             | cytochrome c family protein                                      | N.D.  |
|           | GSU0703 |             | hypothetical protein                                             | N.D.  |
|           | GSU0704 |             | hypothetical protein                                             | N.D.  |
|           | GSU0705 |             | cytochrome c biogenesis protein, CcmF/CcyK/CcsA family           | -1.28 |

|            |                       |                                                                  |       |
|------------|-----------------------|------------------------------------------------------------------|-------|
| <b>79</b>  | GSU0516               | hypothetical protein                                             | N.D.  |
|            | GSU0517               | hypothetical protein                                             | N.D.  |
|            | GSU0518               | sodium/solute symporter family protein                           | -1.44 |
|            | GSU0519               | hypothetical protein                                             | N.D.  |
|            | GSU0520               | hypothetical protein                                             | N.D.  |
|            | GSU0521               | methyltransferase, putative                                      | N.D.  |
|            |                       |                                                                  |       |
| <b>81</b>  | GSU3229               | DNA-binding response regulator, LuxR family                      | -1.36 |
|            | GSU3230               | sensory box histidine kinase                                     | N.D.  |
|            |                       |                                                                  |       |
| <b>82</b>  | GSU3195               | chemotaxis protein methyltransferase CheR, putative              | -1.27 |
|            | GSU3196               | methyl-accepting chemotaxis protein                              | N.D.  |
|            | GSU3197               | purine-binding chemotaxis protein CheW, putative                 | N.D.  |
|            | GSU3198 <i>cheY-7</i> | chemotaxis protein CheY                                          | N.D.  |
|            | GSU3199 <i>cheA-3</i> | chemotaxis protein CheA                                          | N.D.  |
|            | GSU3200               | chemotaxis protein, CheC family                                  | N.D.  |
|            | GSU3201               | chemotaxis protein CheD, putative                                | N.D.  |
|            | GSU3202               | hypothetical protein                                             | N.D.  |
|            |                       |                                                                  |       |
| <b>87</b>  | GSU2525               | nitroreductase family protein                                    | -1.53 |
|            | GSU2526               | membrane protein, putative                                       | N.D.  |
|            |                       |                                                                  |       |
| <b>91</b>  | GSU1251               | BNR repeat domain protein                                        | N.D.  |
|            | GSU1252               | hypothetical protein                                             | N.D.  |
|            | GSU1253               | hypothetical protein                                             | -1.41 |
|            | GSU1254               | hypothetical protein                                             | N.D.  |
|            | GSU1255               | hypothetical protein                                             | N.D.  |
|            | GSU1256               | hypothetical protein                                             | N.D.  |
|            | GSU1257               | ABC transporter, periplasmic-substrate binding protein, putative | N.D.  |
|            |                       |                                                                  |       |
| <b>101</b> | GSU1994               | hypothetical protein                                             | 1.90  |

|            |         |             |                                                             |       |
|------------|---------|-------------|-------------------------------------------------------------|-------|
| <b>103</b> | GSU1835 | <i>glnA</i> | glutamine synthetase, type I                                | N.D.  |
|            | GSU1836 | <i>glnB</i> | nitrogen regulatory protein PII                             | 1.77  |
|            |         |             |                                                             |       |
| <b>108</b> | GSU1401 | <i>dnaE</i> | DNA polymerase III, alpha subunit                           | -1.37 |
|            | GSU1402 | <i>accA</i> | acetyl-CoA carboxylase, carboxyl transferase, alpha subunit | 1.77  |
